# Supplementary material for: Influence of hydration on ion–biomolecule interactions: M+(indole)(H2O)n(M = Na, K; n = 3–6)
Source: Royal Society of Chemistry journal article supplement (doi:10.1039/c5cp01565k), 2015-01-01
Supplement: c5cp01565k1.pdf [file c5cp01565k1.pdf]

## Supporting Material

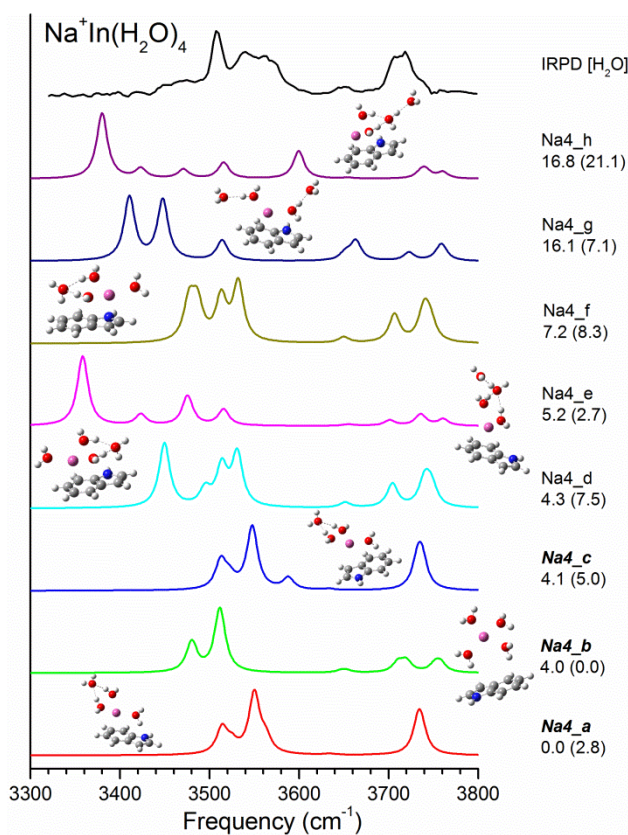

Figure S-1. IRPD spectra in the  $[\text{H}_2\text{O}]$  dissociation channel of  $\text{Na}^+(\text{Indole})(\text{H}_2\text{O})_4$ , together with geometries, spectra and relative Gibbs free energies (kJ/mol) of all calculated theoretical structures at 0K and 300K (in parenthesis). The conformers denoted by bold and italic font (**Na4\_a**, **Na4\_b** and **Na4\_c**) are shown in Figure 8 in the paper.

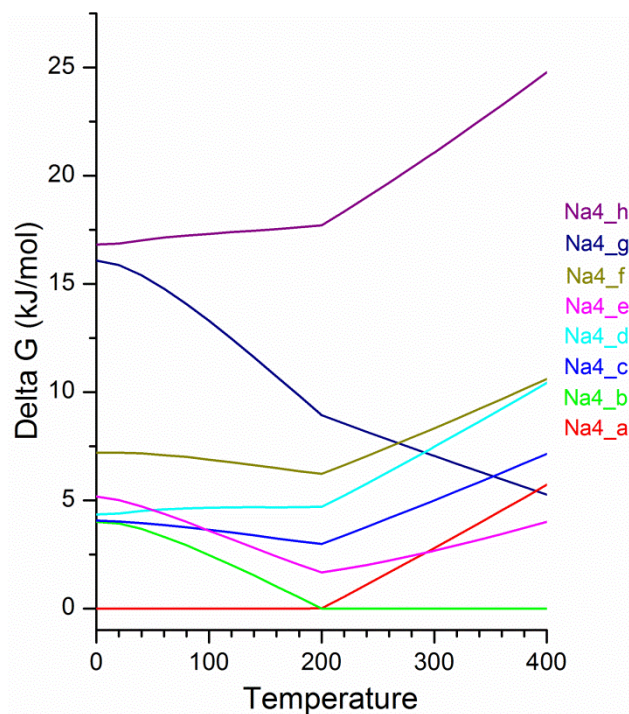

Figure S-2. Relative Gibbs free energies of  $\text{Na}^+(\text{Indole})(\text{H}_2\text{O})_4$  structural conformers as function of temperature.

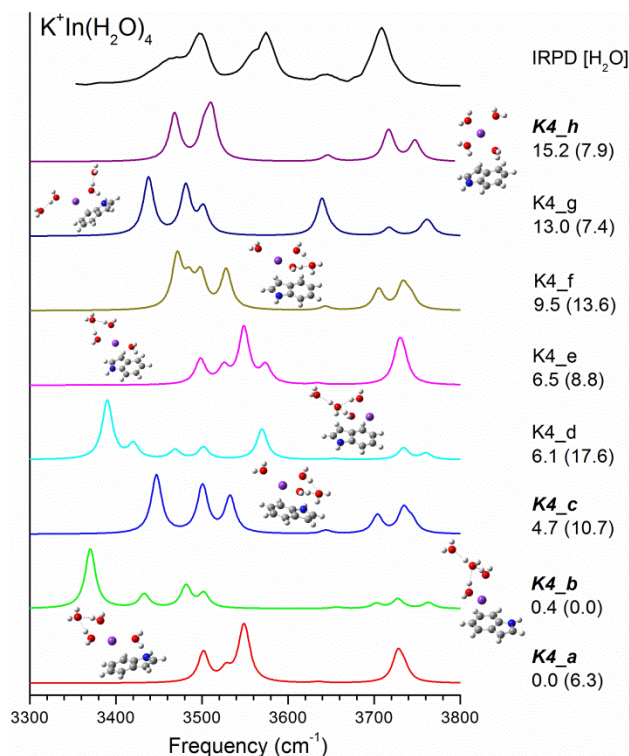

Figure S-3. IRPD spectra in the  $[\text{H}_2\text{O}]$  dissociation channel of  $\text{K}^+(\text{Indole})(\text{H}_2\text{O})_4$ , together with geometries, spectra and relative Gibbs free energies (kJ/mol) of all calculated theoretical structures at 0K and 300K (in parenthesis). The conformers denoted by bold and italic font (***K4\_a***, ***K4\_b***, ***K4\_c*** and ***K4\_h***) are shown in Figure 9 in the paper.

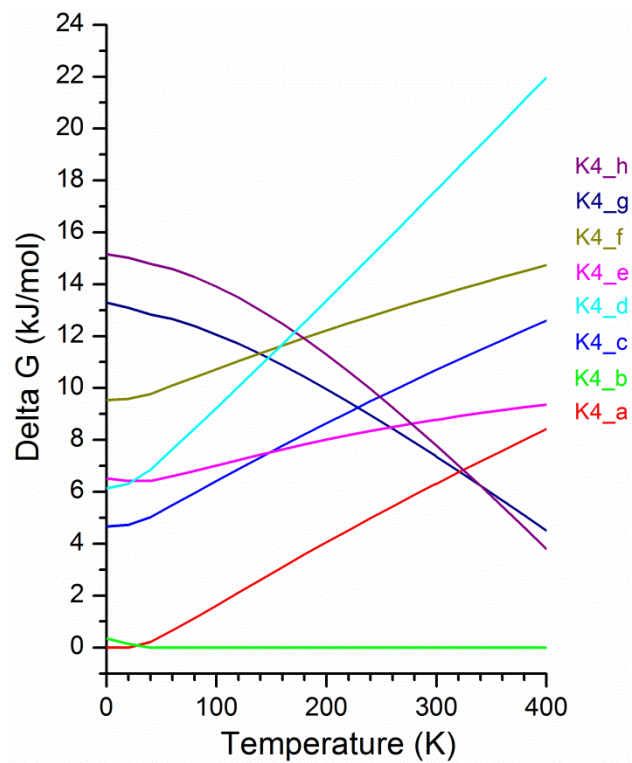

Figure S-4. Relative Gibbs free energies of  $K^+(\text{Indole})(\text{H}_2\text{O})_4$  structural conformers as function of temperature.

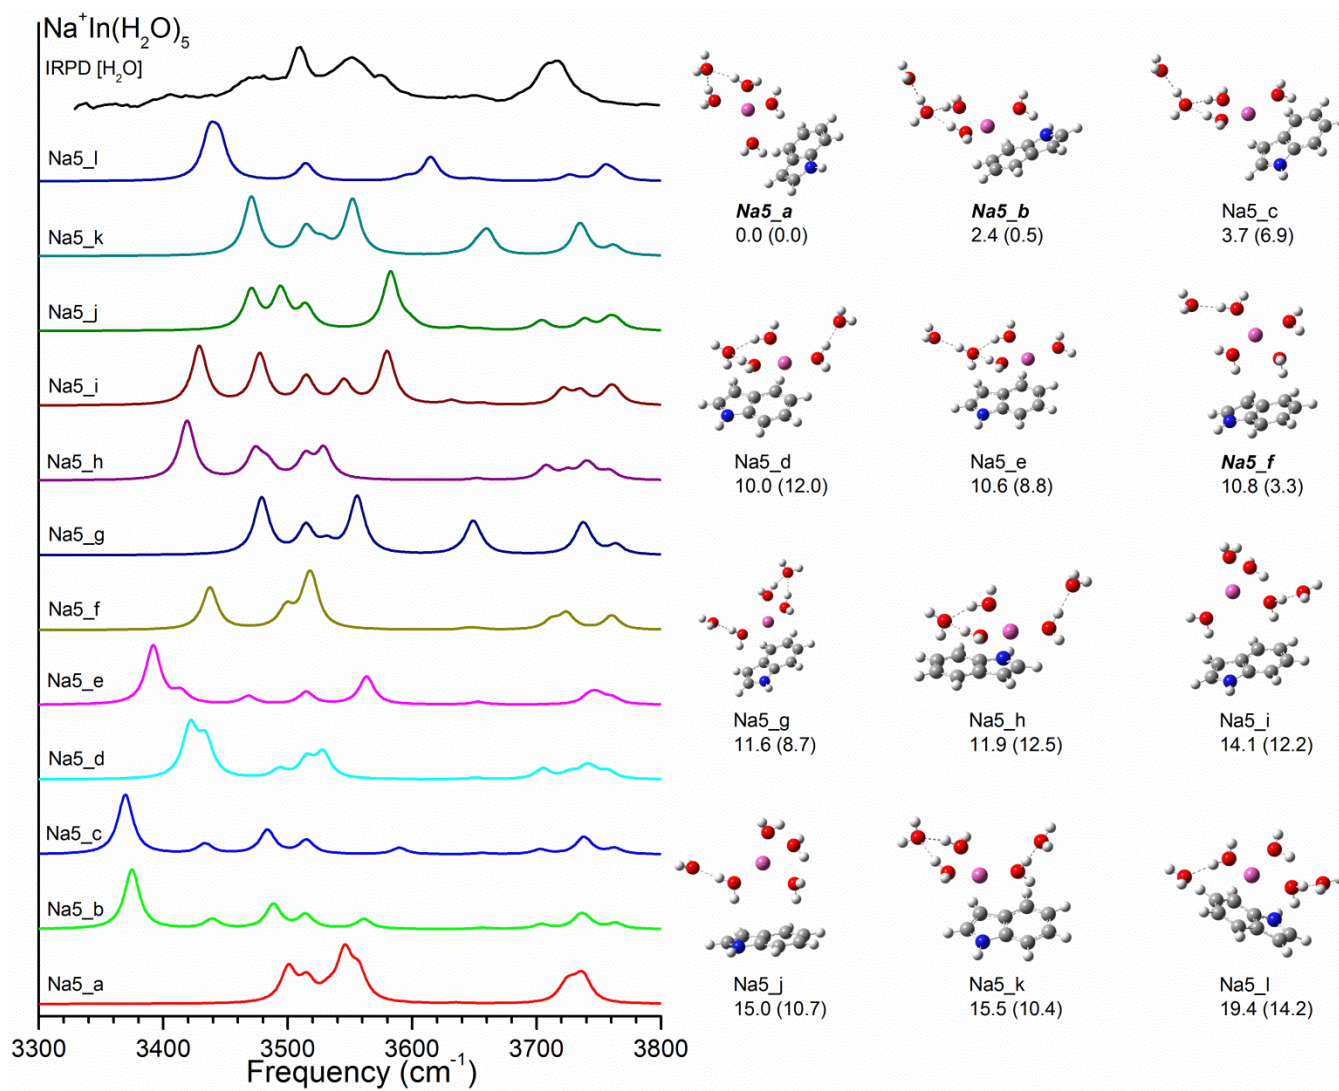

Figure S-5. IRPD spectra in the [H<sub>2</sub>O] dissociation channel of Na<sup>+</sup>(Indole)(H<sub>2</sub>O)<sub>5</sub>, together with geometries, spectra and relative Gibbs free energies (kJ/mol) of all calculated theoretical structures at 0K and 300K (in parenthesis). The conformers denoted by bold and italic font (Na5\_a, Na5\_b and Na5\_f) are shown in Figure 12 in the paper.

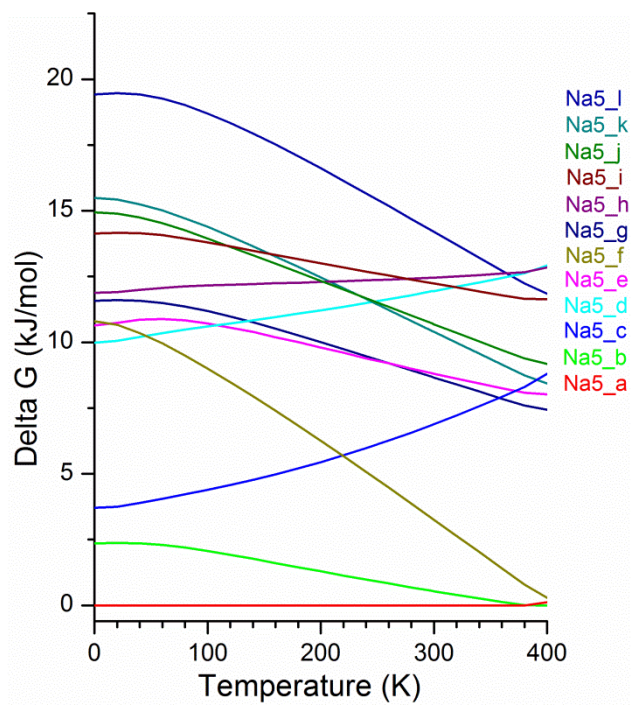

Figure S-6. Relative Gibbs free energies of  $\text{Na}^+(\text{Indole})(\text{H}_2\text{O})_5$  structural conformers as function of temperature.

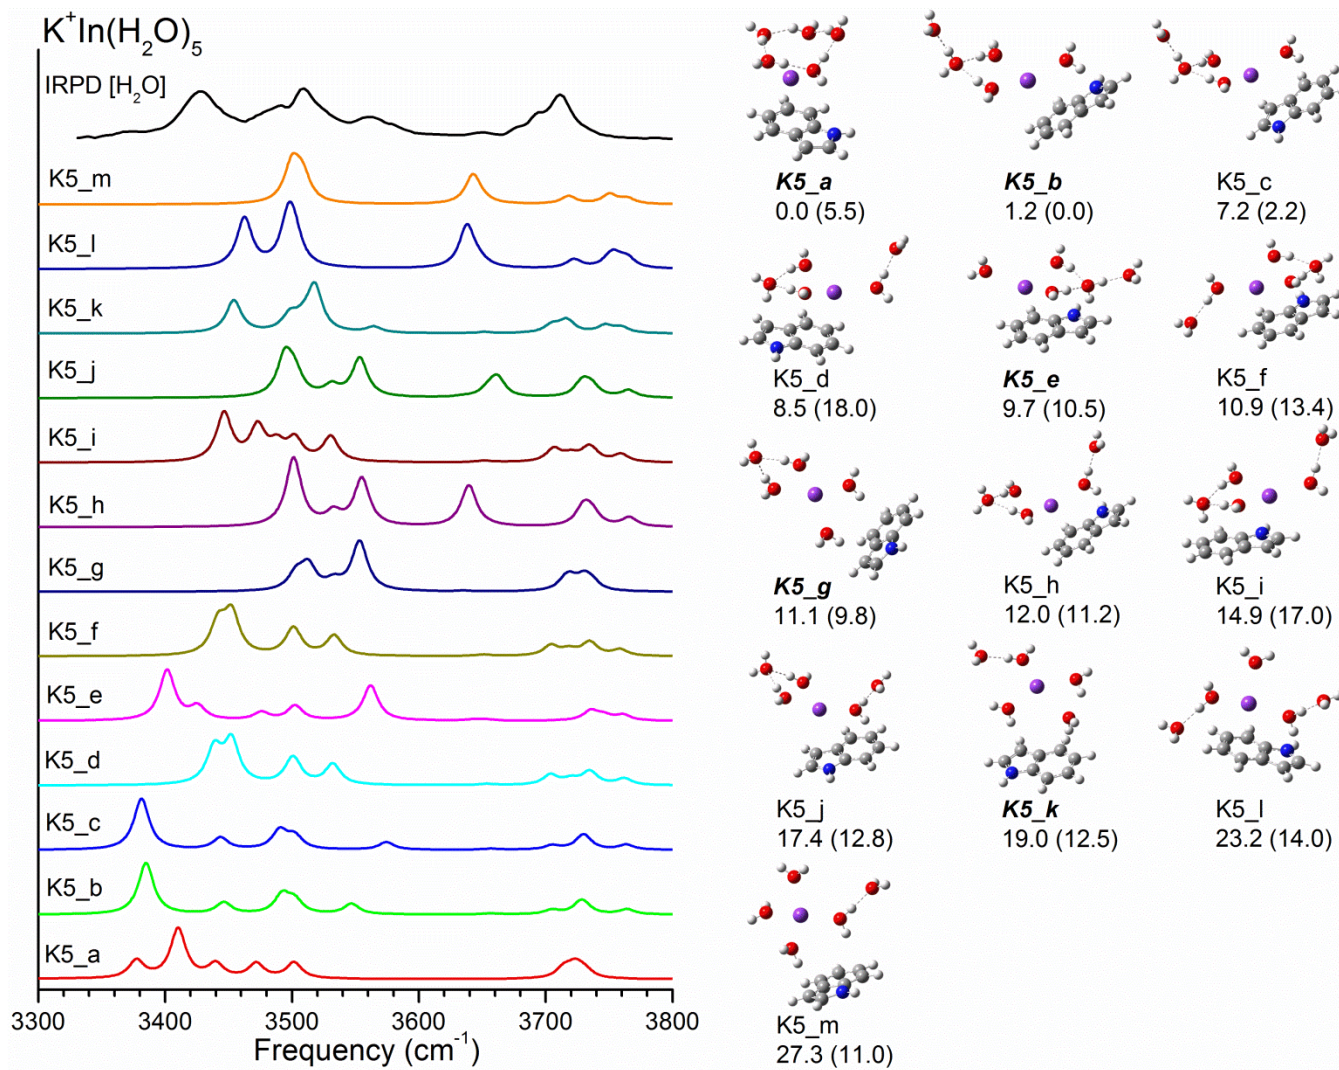

Figure S-7. IRPD spectra in the [H<sub>2</sub>O] dissociation channel of K<sup>+</sup>(Indole)(H<sub>2</sub>O)<sub>5</sub>, together with geometries, spectra and relative Gibbs free energies (kJ/mol) of all calculated theoretical structures at 0K and 300K (in parenthesis). The conformers denoted by bold and italic font (K5\_a, K5\_b, K5\_e, K5\_g and K5\_k) are shown in Figure 13 in the paper.

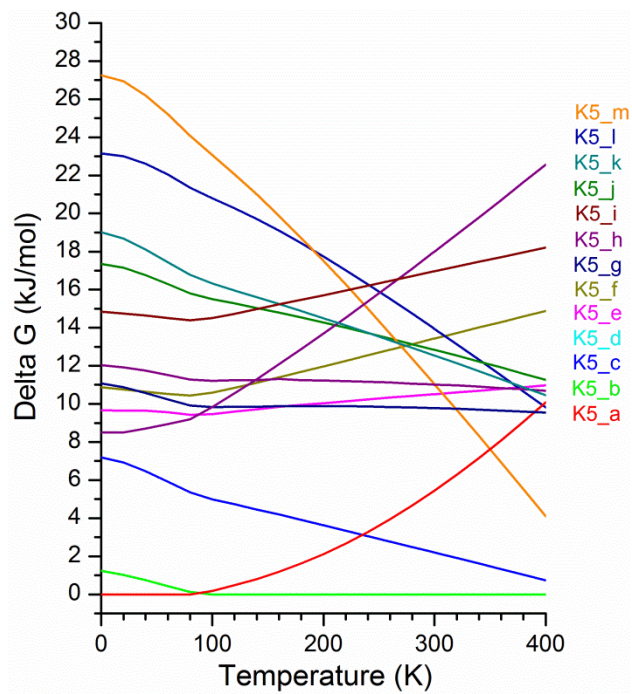

Figure S-8. Relative Gibbs free energies of  $K^+(\text{Indole})(\text{H}_2\text{O})_5$  structural conformers as function of temperature.

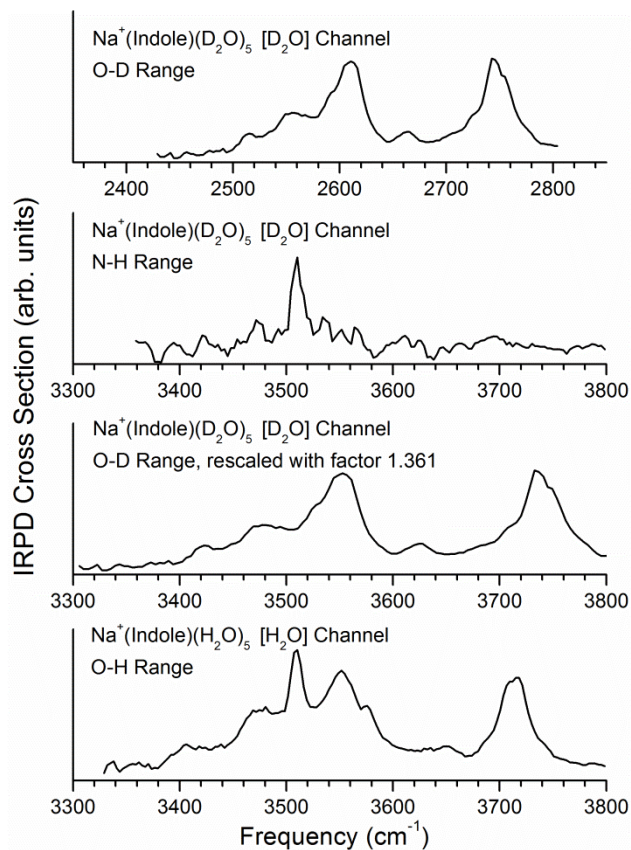

Figure S-9. From top to bottom, (a) IRPD spectra of Na<sup>+</sup>(Indole)(D<sub>2</sub>O)<sub>5</sub> in the [D<sub>2</sub>O] dissociation channel and in the OD stretching range (2350 cm<sup>-1</sup> ~ 2850 cm<sup>-1</sup>); (b) IRPD spectra of Na<sup>+</sup>(Indole)(D<sub>2</sub>O)<sub>5</sub> in the [D<sub>2</sub>O] dissociation channel and in the NH stretching range (3300 cm<sup>-1</sup> ~ 3650 cm<sup>-1</sup>); (c) IRPD spectra of Na<sup>+</sup>(Indole)(D<sub>2</sub>O)<sub>5</sub> in the [D<sub>2</sub>O] dissociation channel and in the OD stretching range, rescaled to the OH stretching range using the scaling factor of 1.358; (d) IRPD spectra of Na<sup>+</sup>(Indole)(H<sub>2</sub>O)<sub>5</sub> in the [H<sub>2</sub>O] dissociation channel and in the OH stretching range (3300 cm<sup>-1</sup> ~ 3800 cm<sup>-1</sup>).



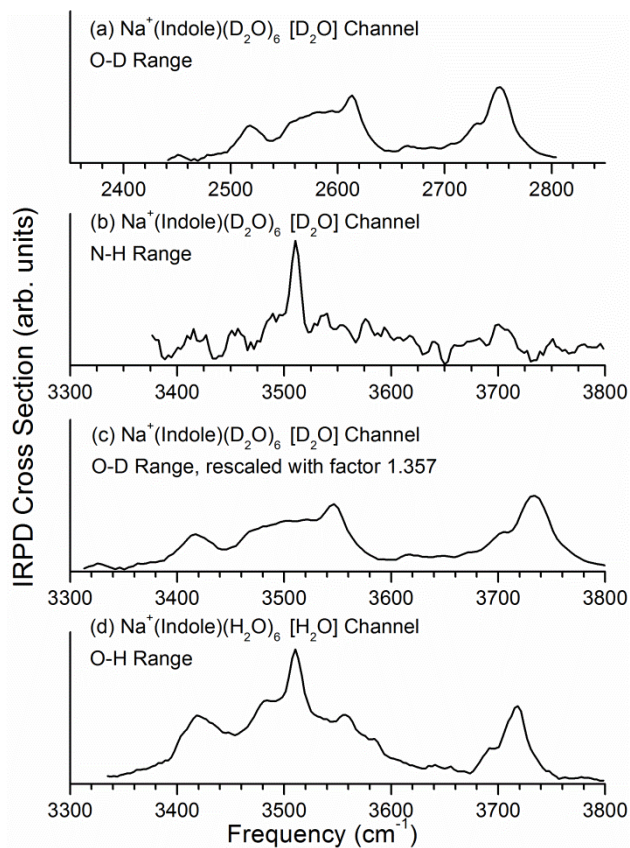

Figure S-10. From top to bottom, (a) IRPD spectra of  $\text{K}^+(\text{Indole})(\text{D}_2\text{O})_6$  in the  $[\text{D}_2\text{O}]$  dissociation channel and in the OD stretching range ( $2350 \text{ cm}^{-1} \sim 2850 \text{ cm}^{-1}$ ); (b) IRPD spectra of  $\text{K}^+(\text{Indole})(\text{D}_2\text{O})_6$  in the  $[\text{D}_2\text{O}]$  dissociation channel and in the NH stretching range ( $3300 \text{ cm}^{-1} \sim 3650 \text{ cm}^{-1}$ ); (c) IRPD spectra of  $\text{K}^+(\text{Indole})(\text{D}_2\text{O})_6$  in the  $[\text{D}_2\text{O}]$  dissociation channel and in the OD stretching range, rescaled to the OH stretching range using the scaling factor of 1.358; (d) IRPD spectra of  $\text{K}^+(\text{Indole})(\text{H}_2\text{O})_6$  in the  $[\text{H}_2\text{O}]$  dissociation channel and in the OH stretching range ( $3300 \text{ cm}^{-1} \sim 3800 \text{ cm}^{-1}$ ).

Table S-1. Coordinates of stable conformations from theoretical calculations.

| Na3_a         |               |                         |          |          | K3_a          |               |                         |          |          |
|---------------|---------------|-------------------------|----------|----------|---------------|---------------|-------------------------|----------|----------|
| Center Number | Atomic Number | Coordinates (Angstroms) |          |          | Center Number | Atomic Number | Coordinates (Angstroms) |          |          |
|               |               | X                       | Y        | Z        |               |               | X                       | Y        | Z        |
| 1             | 1             | 2.74857                 | -1.9175  | 0.379657 | 1             | 1             | 2.759931                | -2.14908 | 0.689591 |
| 2             | 6             | 2.133374                | -1.34546 | 1.069737 | 2             | 6             | 2.115652                | -1.56875 | 1.345672 |
| 3             | 6             | 0.554847                | 0.123518 | 2.945818 | 3             | 6             | 0.464251                | -0.08143 | 3.141297 |
| 4             | 6             | 0.752825                | -1.61646 | 1.187205 | 4             | 6             | 0.744006                | -1.88051 | 1.456461 |
| 5             | 6             | 2.704687                | -0.3589  | 1.874281 | 5             | 6             | 2.640807                | -0.53154 | 2.114866 |
| 6             | 6             | 1.921563                | 0.371346 | 2.801726 | 6             | 6             | 1.822041                | 0.207558 | 3.001875 |
| 7             | 6             | -0.01563                | -0.87348 | 2.139722 | 7             | 6             | -0.05994                | -1.12919 | 2.369795 |
| 8             | 1             | -0.03629                | 0.667046 | 3.678533 | 8             | 1             | -0.15408                | 0.467877 | 3.846962 |
| 9             | 1             | 3.771347                | -0.1628  | 1.810092 | 9             | 1             | 3.701927                | -0.30394 | 2.058201 |
| 10            | 1             | 2.397598                | 1.117968 | 3.430899 | 10            | 1             | 2.264429                | 0.993652 | 3.607499 |
| 11            | 1             | 0.099669                | -3.28402 | -0.19182 | 11            | 1             | 0.164406                | -3.62284 | 0.136479 |
| 12            | 7             | -1.30719                | -1.35008 | 2.075833 | 12            | 7             | -1.3366                 | -1.64935 | 2.307464 |
| 13            | 1             | -2.06794                | -1.06774 | 2.678025 | 13            | 1             | -2.10924                | -1.37976 | 2.900126 |
| 14            | 6             | -1.37577                | -2.36571 | 1.139501 | 14            | 6             | -1.35941                | -2.70261 | 1.410747 |
| 15            | 6             | -0.14365                | -2.55184 | 0.565885 | 15            | 6             | -0.11352                | -2.86843 | 0.859975 |
| 16            | 1             | -2.30991                | -2.88031 | 0.960411 | 16            | 1             | -2.27291                | -3.25641 | 1.242261 |
| 17            | 8             | 1.576861                | 1.254223 | -1.99377 | 17            | 19            | 0.80684                 | 1.051248 | -0.04589 |
| 18            | 1             | 2.037632                | 0.683235 | -2.62662 | 18            | 8             | 1.589147                | 1.567271 | -2.54921 |
| 19            | 1             | 1.305993                | 2.060524 | -2.47823 | 19            | 1             | 2.056824                | 1.093821 | -3.2538  |
| 20            | 8             | 0.055726                | 3.117201 | 0.028939 | 20            | 1             | 1.386871                | 2.457663 | -2.90146 |
| 21            | 1             | 0.077116                | 3.552553 | -0.848   | 21            | 8             | -0.06363                | 3.562432 | -0.35437 |
| 22            | 1             | -0.36631                | 3.73748  | 0.641974 | 22            | 1             | 0.122238                | 3.981346 | -1.21933 |
| 23            | 8             | 0.487444                | 3.78912  | -2.70878 | 23            | 1             | -0.51309                | 4.232652 | 0.182303 |
| 24            | 1             | -0.25967                | 3.844672 | -3.32859 | 24            | 8             | 0.741067                | 4.272278 | -3.02319 |
| 25            | 1             | 1.077351                | 4.526307 | -2.9413  | 25            | 1             | 0.060926                | 4.446968 | -3.69548 |
| 26            | 11            | 1.053872                | 1.102128 | 0.192587 | 26            | 1             | 1.415156                | 4.962103 | -3.14513 |
|               |               |                         |          |          |               |               |                         |          |          |
| Na3_b         |               |                         |          |          | K3_b          |               |                         |          |          |
| Center Number | Atomic Number | Coordinates (Angstroms) |          |          | Center Number | Atomic Number | Coordinates (Angstroms) |          |          |
|               |               | X                       | Y        | Z        |               |               | X                       | Y        | Z        |
| 1             | 1             | -1.20751                | -2.245   | 2.323777 | 1             | 1             | -1.2877                 | -1.84355 | 2.741573 |
| 2             | 6             | -0.25544                | -2.08463 | 1.824412 | 2             | 6             | -0.36205                | -1.87313 | 2.172198 |
| 3             | 6             | 2.276316                | -1.7113  | 0.550936 | 3             | 6             | 2.100386                | -1.99879 | 0.728063 |
| 4             | 6             | 0.417934                | -0.85181 | 1.947388 | 4             | 6             | 0.48177                 | -0.74506 | 2.124375 |
| 5             | 6             | 0.33031                 | -3.10304 | 1.073047 | 5             | 6             | 0.02518                 | -3.03553 | 1.50888  |
| 6             | 6             | 1.583654                | -2.91633 | 0.440216 | 6             | 6             | 1.242838                | -3.09634 | 0.789842 |
| 7             | 6             | 1.686867                | -0.69277 | 1.312876 | 7             | 6             | 1.711808                | -0.83456 | 1.406411 |
| 8             | 1             | 3.249132                | -1.58015 | 0.084213 | 8             | 1             | 3.047929                | -2.05822 | 0.198781 |
| 9             | 1             | -0.16413                | -4.06785 | 0.997014 | 9             | 1             | -0.59932                | -3.92302 | 1.569373 |
| 10            | 1             | 2.026491                | -3.73756 | -0.11637 | 10            | 1             | 1.53023                 | -4.02475 | 0.303865 |
| 11            | 1             | -0.72889                | 0.611245 | 3.240539 | 11            | 1             | -0.34246                | 0.975567 | 3.343219 |





|               |               |                         |          |          |  | 14            | 6             | -0.84679                | -3.26369 | 2.489905 |
|---------------|---------------|-------------------------|----------|----------|--|---------------|---------------|-------------------------|----------|----------|
|               |               |                         |          |          |  | 15            | 6             | 0.305602                | -3.19644 | 1.74055  |
|               |               |                         |          |          |  | 16            | 1             | -1.52612                | -4.09053 | 2.647937 |
|               |               |                         |          |          |  | 17            | 8             | -3.31493                | -2.2754  | -1.64508 |
|               |               |                         |          |          |  | 18            | 1             | -3.95677                | -1.77435 | -2.17382 |
|               |               |                         |          |          |  | 19            | 1             | -3.73644                | -3.13592 | -1.49017 |
|               |               |                         |          |          |  | 20            | 8             | 0.707369                | -1.68137 | -2.9485  |
|               |               |                         |          |          |  | 21            | 1             | 1.503451                | -1.16415 | -3.15119 |
|               |               |                         |          |          |  | 22            | 1             | 0.598925                | -2.28339 | -3.70208 |
|               |               |                         |          |          |  | 23            | 8             | -0.73697                | 1.162962 | 0.076538 |
|               |               |                         |          |          |  | 24            | 1             | -0.9828                 | 2.060697 | -0.19447 |
|               |               |                         |          |          |  | 25            | 1             | -0.20786                | 1.265556 | 0.890237 |
|               |               |                         |          |          |  | 26            | 19            | -0.88975                | -1.36887 | -0.77147 |
|               |               |                         |          |          |  |               |               |                         |          |          |
| <b>Na4_a</b>  |               |                         |          |          |  | <b>K4_a</b>   |               |                         |          |          |
| Center Number | Atomic Number | Coordinates (Angstroms) |          |          |  | Center Number | Atomic Number | Coordinates (Angstroms) |          |          |
|               |               | X                       | Y        | Z        |  |               |               | X                       | Y        | Z        |
| 1             | 1             | 2.362205                | -1.88681 | 0.13767  |  | 1             | 1             | 2.387866                | -2.34939 | 0.421451 |
| 2             | 6             | 1.831976                | -1.33023 | 0.906643 |  | 2             | 6             | 1.895869                | -1.68357 | 1.126088 |
| 3             | 6             | 0.493556                | 0.116761 | 2.975143 |  | 3             | 6             | 0.651257                | 0.049664 | 3.025699 |
| 4             | 6             | 0.623843                | -1.82351 | 1.440051 |  | 4             | 6             | 0.615889                | -1.99513 | 1.627122 |
| 5             | 6             | 2.351068                | -0.13449 | 1.401508 |  | 5             | 6             | 2.533367                | -0.52782 | 1.571446 |
| 6             | 6             | 1.684933                | 0.584154 | 2.423669 |  | 6             | 6             | 1.915011                | 0.332578 | 2.509592 |
| 7             | 6             | -0.02066                | -1.08905 | 2.47986  |  | 7             | 6             | 0.017925                | -1.11993 | 2.581967 |
| 8             | 1             | -0.00468                | 0.661281 | 3.77298  |  | 8             | 1             | 0.190814                | 0.698842 | 3.766112 |
| 9             | 1             | 3.296863                | 0.240347 | 1.019197 |  | 9             | 1             | 3.533081                | -0.29365 | 1.215401 |
| 10            | 1             | 2.122803                | 1.503932 | 2.800811 |  | 10            | 1             | 2.446125                | 1.215094 | 2.855628 |
| 11            | 1             | 0.014985                | -3.78275 | 0.481975 |  | 11            | 1             | -0.1597                 | -3.95431 | 0.798514 |
| 12            | 7             | -1.16132                | -1.78598 | 2.823026 |  | 12            | 7             | -1.20393                | -1.66511 | 2.924924 |
| 13            | 1             | -1.80999                | -1.52764 | 3.553478 |  | 13            | 1             | -1.84261                | -1.28977 | 3.611992 |
| 14            | 6             | -1.2587                 | -2.92164 | 2.046087 |  | 14            | 6             | -1.3917                 | -2.84482 | 2.234599 |
| 15            | 6             | -0.19262                | -2.97995 | 1.177253 |  | 15            | 6             | -0.30832                | -3.08001 | 1.418795 |
| 16            | 1             | -2.07696                | -3.61459 | 2.188587 |  | 16            | 1             | -2.28177                | -3.43805 | 2.395941 |
| 17            | 8             | 1.625093                | 1.500629 | -2.20367 |  | 17            | 19            | 0.319919                | 0.929863 | -0.42613 |
| 18            | 1             | 2.140746                | 1.013914 | -2.86375 |  | 18            | 8             | 1.818353                | 1.868452 | -2.46396 |
| 19            | 1             | 1.63828                 | 2.442039 | -2.46941 |  | 19            | 1             | 2.451347                | 1.498616 | -3.09758 |
| 20            | 8             | -0.20991                | 3.100048 | -0.23997 |  | 20            | 1             | 1.727798                | 2.816802 | -2.68538 |
| 21            | 1             | 0.171822                | 3.723676 | -0.89023 |  | 21            | 8             | -0.40165                | 3.532369 | -0.50553 |
| 22            | 1             | -0.77615                | 3.61921  | 0.350118 |  | 22            | 1             | 0.0346                  | 4.083658 | -1.18585 |
| 23            | 8             | 1.22316                 | 4.326263 | -2.39114 |  | 23            | 1             | -1.02223                | 4.113559 | -0.04086 |
| 24            | 1             | 0.747139                | 4.711663 | -3.14601 |  | 24            | 8             | 1.15891                 | 4.667326 | -2.64867 |
| 25            | 1             | 1.960543                | 4.932556 | -2.20746 |  | 25            | 1             | 0.708464                | 4.999963 | -3.44311 |
| 26            | 8             | -1.30727                | -0.57947 | -0.77967 |  | 26            | 1             | 1.842839                | 5.325093 | -2.43822 |
| 27            | 1             | -1.28787                | -1.44186 | -0.3219  |  | 27            | 8             | -1.49957                | -1.01199 | -0.81868 |
| 28            | 1             | -2.07306                | -0.59786 | -1.3736  |  | 28            | 1             | -1.40709                | -1.78232 | -0.2245  |
| 29            | 11            | 0.375659                | 0.902846 | -0.38893 |  | 29            | 1             | -2.24538                | -1.21253 | -1.40451 |

| Na4_b         |               |                         |          |          | K4_b          |               |                         |          |          |
|---------------|---------------|-------------------------|----------|----------|---------------|---------------|-------------------------|----------|----------|
| Center Number | Atomic Number | Coordinates (Angstroms) |          |          | Center Number | Atomic Number | Coordinates (Angstroms) |          |          |
|               |               | X                       | Y        | Z        |               |               | X                       | Y        | Z        |
| 1             | 1             | 2.28725                 | -2.118   | 0.907138 | 1             | 1             | 2.744811                | -2.19906 | 0.707135 |
| 2             | 6             | 1.634386                | -1.52739 | 1.545263 | 2             | 6             | 2.114802                | -1.59548 | 1.356042 |
| 3             | 6             | -0.02236                | 0.019834 | 3.284704 | 3             | 6             | 0.497073                | -0.04608 | 3.129353 |
| 4             | 6             | 0.428814                | -2.06926 | 2.032108 | 4             | 6             | 0.729213                | -1.84763 | 1.440316 |
| 5             | 6             | 1.996269                | -0.23615 | 1.927447 | 5             | 6             | 2.670351                | -0.58592 | 2.140309 |
| 6             | 6             | 1.172916                | 0.530125 | 2.787903 | 6             | 6             | 1.868415                | 0.183852 | 3.016402 |
| 7             | 6             | -0.37648                | -1.28132 | 2.904537 | 7             | 6             | -0.05797                | -1.06597 | 2.34241  |
| 8             | 1             | -0.64298                | 0.603454 | 3.959392 | 8             | 1             | -0.11                   | 0.527631 | 3.825288 |
| 9             | 1             | 2.945552                | 0.176658 | 1.595148 | 9             | 1             | 3.741037                | -0.40362 | 2.103064 |
| 10            | 1             | 1.492764                | 1.52512  | 3.084665 | 10            | 1             | 2.333069                | 0.947977 | 3.633378 |
| 11            | 1             | 0.134389                | -4.2126  | 1.359776 | 11            | 1             | 0.098128                | -3.55425 | 0.097549 |
| 12            | 7             | -1.46772                | -2.05152 | 3.258169 | 12            | 7             | -1.3551                 | -1.52815 | 2.252378 |
| 13            | 1             | -2.20058                | -1.77181 | 3.895196 | 13            | 1             | -2.12751                | -1.22365 | 2.828046 |
| 14            | 6             | -1.37358                | -3.28865 | 2.659351 | 14            | 6             | -1.4077                 | -2.57395 | 1.348215 |
| 15            | 6             | -0.23416                | -3.34092 | 1.885747 | 15            | 6             | -0.15982                | -2.79289 | 0.821142 |
| 16            | 1             | -2.11841                | -4.04923 | 2.852038 | 16            | 1             | -2.34192                | -3.08425 | 1.157509 |
| 17            | 8             | -1.76816                | -2.45552 | -0.80065 | 17            | 19            | 0.948026                | 1.094466 | -0.054   |
| 18            | 1             | -2.37481                | -3.16638 | -1.059   | 18            | 8             | 1.804104                | 1.606728 | -2.51746 |
| 19            | 1             | -1.40629                | -2.7217  | 0.071807 | 19            | 1             | 2.312096                | 1.177056 | -3.2214  |
| 20            | 8             | 0.753027                | -0.51504 | -3.37434 | 20            | 1             | 1.553485                | 2.495703 | -2.85425 |
| 21            | 1             | 1.399947                | 0.04274  | -2.9112  | 21            | 8             | -0.0215                 | 3.547255 | -0.40656 |
| 22            | 1             | 1.198118                | -0.86793 | -4.15995 | 22            | 1             | 0.194428                | 3.934965 | -1.28409 |
| 23            | 8             | 0.339745                | 0.697941 | -0.74233 | 23            | 1             | -0.5136                 | 4.224764 | 0.080234 |
| 24            | 1             | 0.180411                | 1.636683 | -0.55591 | 24            | 8             | 0.808273                | 4.188927 | -3.01683 |
| 25            | 1             | 0.793245                | 0.354259 | 0.055771 | 25            | 1             | 0.11779                 | 4.26861  | -3.69443 |
| 26            | 11            | -1.04436                | -0.67602 | -1.98979 | 26            | 1             | 1.428444                | 4.942897 | -3.17154 |
| 27            | 8             | -2.74934                | 0.304266 | -3.15673 | 27            | 8             | 2.529523                | 6.289504 | -3.48263 |
| 28            | 1             | -2.63483                | 0.730825 | -4.02106 | 28            | 1             | 3.307417                | 6.277242 | -4.06184 |
| 29            | 1             | -3.69484                | 0.378425 | -2.95184 | 29            | 1             | 2.443054                | 7.199675 | -3.15882 |
|               |               |                         |          |          |               |               |                         |          |          |
|               |               |                         |          |          |               |               |                         |          |          |
| Na4_c         |               |                         |          |          | K4_c          |               |                         |          |          |
| Center Number | Atomic Number | Coordinates (Angstroms) |          |          | Center Number | Atomic Number | Coordinates (Angstroms) |          |          |
|               |               | X                       | Y        | Z        |               |               | X                       | Y        | Z        |
| 1             | 1             | -1.06305                | 0.418348 | 2.516731 | 1             | 1             | 2.490357                | -2.36745 | 0.593685 |
| 2             | 6             | -0.58878                | -0.48425 | 2.138814 | 2             | 6             | 1.943887                | -1.74126 | 1.293771 |
| 3             | 6             | 0.64997                 | -2.88962 | 1.222006 | 3             | 6             | 0.546694                | -0.10444 | 3.173789 |
| 4             | 6             | 0.787229                | -0.49054 | 1.824352 | 4             | 6             | 0.626406                | -2.07043 | 1.668946 |
| 5             | 6             | -1.32247                | -1.65435 | 1.982055 | 5             | 6             | 2.54561                 | -0.61918 | 1.85805  |
| 6             | 6             | -0.71063                | -2.84442 | 1.522659 | 6             | 6             | 1.85234                 | 0.192809 | 2.787874 |
| 7             | 6             | 1.386938                | -1.70786 | 1.385067 | 7             | 6             | -0.04733                | -1.24458 | 2.615231 |
| 8             | 1             | 1.122148                | -3.81333 | 0.897389 | 8             | 1             | 0.025359                | 0.506604 | 3.905909 |
| 9             | 1             | -2.37986                | -1.66462 | 2.230108 | 9             | 1             | 3.576427                | -0.38042 | 1.608644 |

|               |               |                         |          |          |  |               |               |                         |          |          |
|---------------|---------------|-------------------------|----------|----------|--|---------------|---------------|-------------------------|----------|----------|
| 10            | 1             | -1.30676                | -3.74782 | 1.428507 |  | 10            | 1             | 2.358735                | 1.04401  | 3.235733 |
| 11            | 1             | 1.754389                | 1.524778 | 2.201453 |  | 11            | 1             | -0.05524                | -4.01319 | 0.726168 |
| 12            | 7             | 2.727178                | -1.44904 | 1.17488  |  | 12            | 7             | -1.28678                | -1.81041 | 2.842348 |
| 13            | 1             | 3.417826                | -2.13018 | 0.891392 |  | 13            | 1             | -1.98015                | -1.46266 | 3.48984  |
| 14            | 6             | 2.994144                | -0.12786 | 1.466144 |  | 14            | 6             | -1.41196                | -2.96158 | 2.09514  |
| 15            | 6             | 1.834173                | 0.500553 | 1.860238 |  | 15            | 6             | -0.27004                | -3.15267 | 1.347199 |
| 16            | 1             | 4.001823                | 0.257719 | 1.390645 |  | 16            | 1             | -2.29907                | -3.57532 | 2.179424 |
| 17            | 8             | 1.680569                | 2.209254 | -2.07605 |  | 17            | 19            | 0.790939                | 1.218271 | -0.23886 |
| 18            | 1             | 2.440398                | 2.070599 | -2.66084 |  | 18            | 8             | -1.76605                | -1.7173  | -1.14616 |
| 19            | 1             | 1.392851                | 3.13661  | -2.19772 |  | 19            | 1             | -2.44627                | -2.24748 | -1.59235 |
| 20            | 8             | -0.8731                 | 2.708405 | -0.31445 |  | 20            | 1             | -1.47726                | -2.23694 | -0.36358 |
| 21            | 1             | -0.661                  | 3.533715 | -0.7956  |  | 21            | 8             | 0.579384                | -0.55072 | -2.23323 |
| 22            | 1             | -1.73342                | 2.842986 | 0.110317 |  | 22            | 1             | 0.994934                | -0.86583 | -3.04937 |
| 23            | 8             | 0.325291                | 4.724795 | -1.94869 |  | 23            | 1             | -0.22406                | -1.09383 | -2.09497 |
| 24            | 1             | -0.13368                | 5.081563 | -2.72787 |  | 24            | 8             | -1.87662                | 0.950247 | -0.20372 |
| 25            | 1             | 0.754034                | 5.487094 | -1.52409 |  | 25            | 1             | -2.11017                | 0.06938  | -0.56386 |
| 26            | 8             | -0.24714                | -1.09091 | -1.48008 |  | 26            | 1             | -2.70183                | 1.451934 | -0.13075 |
| 27            | 1             | -0.38225                | -1.81822 | -0.84421 |  | 27            | 8             | 1.99164                 | 3.608592 | -0.78696 |
| 28            | 1             | -0.68823                | -1.36016 | -2.30005 |  | 28            | 1             | 2.599198                | 4.137837 | -0.24589 |
| 29            | 11            | 0.474445                | 0.899339 | -0.65125 |  | 29            | 1             | 1.886979                | 4.111623 | -1.61067 |
|               |               |                         |          |          |  |               |               |                         |          |          |
| <b>Na4_d</b>  |               |                         |          |          |  | <b>K4_d</b>   |               |                         |          |          |
| Center Number | Atomic Number | Coordinates (Angstroms) |          |          |  | Center Number | Atomic Number | Coordinates (Angstroms) |          |          |
|               |               | X                       | Y        | Z        |  |               |               | X                       | Y        | Z        |
| 1             | 1             | 2.33378                 | -2.23437 | 0.525443 |  | 1             | 1             | 2.460412                | -2.58789 | 0.759596 |
| 2             | 6             | 1.770118                | -1.69525 | 1.28195  |  | 2             | 6             | 1.937988                | -1.88518 | 1.403233 |
| 3             | 6             | 0.335867                | -0.29374 | 3.31806  |  | 3             | 6             | 0.603151                | -0.05003 | 3.140112 |
| 4             | 6             | 0.497108                | -2.14629 | 1.681795 |  | 4             | 6             | 0.587849                | -2.09944 | 1.746594 |
| 5             | 6             | 2.306567                | -0.56232 | 1.893052 |  | 5             | 6             | 2.600969                | -0.77639 | 1.925179 |
| 6             | 6             | 1.593375                | 0.133354 | 2.900302 |  | 6             | 6             | 1.938509                | 0.134488 | 2.783705 |
| 7             | 6             | -0.19372                | -1.43761 | 2.707282 |  | 7             | 6             | -0.05449                | -1.17621 | 2.624535 |
| 8             | 1             | -0.20067                | 0.231113 | 4.103816 |  | 8             | 1             | 0.105271                | 0.635693 | 3.820722 |
| 9             | 1             | 3.310358                | -0.23591 | 1.629805 |  | 9             | 1             | 3.653528                | -0.62456 | 1.700111 |
| 10            | 1             | 2.048561                | 0.996062 | 3.379209 |  | 10            | 1             | 2.490001                | 0.973076 | 3.200771 |
| 11            | 1             | -0.09458                | -4.05414 | 0.61346  |  | 11            | 1             | -0.20582                | -4.02886 | 0.869819 |
| 12            | 7             | -1.38571                | -2.09929 | 2.928052 |  | 12            | 7             | -1.3365                 | -1.64049 | 2.837368 |
| 13            | 1             | -2.07418                | -1.85061 | 3.624851 |  | 13            | 1             | -2.02271                | -1.21099 | 3.441816 |
| 14            | 6             | -1.46499                | -3.19705 | 2.098526 |  | 14            | 6             | -1.52012                | -2.81978 | 2.145163 |
| 15            | 6             | -0.33965                | -3.25801 | 1.305126 |  | 15            | 6             | -0.37268                | -3.13148 | 1.451564 |
| 16            | 1             | -2.30993                | -3.87011 | 2.159219 |  | 16            | 1             | -2.45301                | -3.36176 | 2.225702 |
| 17            | 8             | -1.72745                | -1.57778 | -1.07363 |  | 17            | 19            | 0.840245                | 0.858726 | -0.24623 |
| 18            | 1             | -2.46895                | -1.97725 | -1.557   |  | 18            | 8             | -1.86137                | -1.72625 | -1.2207  |
| 19            | 1             | -1.509                  | -2.19104 | -0.33752 |  | 19            | 1             | -2.57634                | -2.21096 | -1.69697 |
| 20            | 8             | 0.748033                | -0.5415  | -1.93425 |  | 20            | 1             | -1.64797                | -2.25438 | -0.42605 |
| 21            | 1             | 1.212042                | -0.77675 | -2.75111 |  | 21            | 8             | 0.581685                | -0.85198 | -2.23802 |
| 22            | 1             | -0.09712                | -1.03757 | -1.92468 |  | 22            | 1             | 0.963349                | -1.20546 | -3.05462 |

|               |               |                         |          |          |  |               |               |                         |          |          |
|---------------|---------------|-------------------------|----------|----------|--|---------------|---------------|-------------------------|----------|----------|
| 23            | 8             | -1.31628                | 0.972329 | 0.015624 |  | 23            | 1             | -0.28362                | -1.30022 | -2.10316 |
| 24            | 1             | -1.76276                | 0.188931 | -0.36861 |  | 24            | 8             | -1.80359                | 0.907473 | -0.32023 |
| 25            | 1             | -2.00491                | 1.599878 | 0.278684 |  | 25            | 1             | -2.0784                 | 0.033452 | -0.6798  |
| 26            | 11            | 0.935898                | 0.839058 | -0.13598 |  | 26            | 1             | -2.5917                 | 1.469723 | -0.30434 |
| 27            | 8             | 2.154506                | 2.743006 | -0.48873 |  | 27            | 8             | -3.85832                | -3.15216 | -2.51488 |
| 28            | 1             | 2.853869                | 3.151027 | 0.046374 |  | 28            | 1             | -4.79308                | -2.90035 | -2.57602 |
| 29            | 1             | 2.036722                | 3.331317 | -1.25173 |  | 29            | 1             | -3.70574                | -3.79804 | -3.22243 |
|               |               |                         |          |          |  |               |               |                         |          |          |
| <b>Na4_e</b>  |               |                         |          |          |  | <b>K4_e</b>   |               |                         |          |          |
| Center Number | Atomic Number | Coordinates (Angstroms) |          |          |  | Center Number | Atomic Number | Coordinates (Angstroms) |          |          |
|               |               | X                       | Y        | Z        |  |               |               | X                       | Y        | Z        |
| 1             | 1             | 3.072085                | -1.4723  | 0.525369 |  | 1             | 1             | -1.69384                | -0.98947 | 2.859522 |
| 2             | 6             | 2.293263                | -1.0675  | 1.166445 |  | 2             | 6             | -0.95715                | -1.54886 | 2.288399 |
| 3             | 6             | 0.275963                | -0.02768 | 2.904975 |  | 3             | 6             | 0.975073                | -3.07202 | 0.834691 |
| 4             | 6             | 0.957302                | -1.50079 | 1.027405 |  | 4             | 6             | 0.346173                | -1.04162 | 2.10898  |
| 5             | 6             | 2.606784                | -0.13667 | 2.157423 |  | 5             | 6             | -1.27779                | -2.79002 | 1.744262 |
| 6             | 6             | 1.606833                | 0.379703 | 3.017474 |  | 6             | 6             | -0.31933                | -3.54389 | 1.02486  |
| 7             | 6             | -0.03447                | -0.97015 | 1.912448 |  | 7             | 6             | 1.293475                | -1.82256 | 1.384416 |
| 8             | 1             | -0.48377                | 0.354211 | 3.582092 |  | 8             | 1             | 1.712072                | -3.66009 | 0.294246 |
| 9             | 1             | 3.637052                | 0.181912 | 2.289899 |  | 9             | 1             | -2.26927                | -3.20607 | 1.903189 |
| 10            | 1             | 1.883096                | 1.087869 | 3.793526 |  | 10            | 1             | -0.59581                | -4.51636 | 0.627706 |
| 11            | 1             | 0.738965                | -3.04557 | -0.60766 |  | 11            | 1             | 0.629047                | 0.949168 | 3.152665 |
| 12            | 7             | -1.23147                | -1.56938 | 1.583388 |  | 12            | 7             | 2.480541                | -1.1109  | 1.366632 |
| 13            | 1             | -2.10571                | -1.44383 | 2.074347 |  | 13            | 1             | 3.363633                | -1.46086 | 1.021542 |
| 14            | 6             | -1.02806                | -2.46114 | 0.546311 |  | 14            | 6             | 2.323226                | 0.063607 | 2.081853 |
| 15            | 6             | 0.29118                 | -2.44163 | 0.169776 |  | 15            | 6             | 1.028784                | 0.153847 | 2.536748 |
| 16            | 1             | -1.8516                 | -3.0474  | 0.162025 |  | 16            | 1             | 3.160452                | 0.733339 | 2.226071 |
| 17            | 8             | 0.464352                | 1.440989 | -1.74713 |  | 17            | 19            | 0.200794                | 1.086321 | -0.52654 |
| 18            | 1             | 0.233149                | 0.801312 | -2.43639 |  | 18            | 8             | 1.718393                | 1.953719 | -2.58463 |
| 19            | 1             | 0.455865                | 2.334923 | -2.15681 |  | 19            | 1             | 2.263571                | 1.559439 | -3.28195 |
| 20            | 8             | 1.156577                | 3.604115 | 0.422028 |  | 20            | 1             | 1.673357                | 2.911565 | -2.77949 |
| 21            | 1             | 0.997482                | 4.027758 | -0.45193 |  | 21            | 8             | -0.31086                | 3.733452 | -0.51369 |
| 22            | 1             | 1.385605                | 4.308125 | 1.046318 |  | 22            | 1             | 0.12824                 | 4.273318 | -1.20106 |
| 23            | 8             | 0.582066                | 4.181608 | -2.25019 |  | 23            | 1             | -0.87863                | 4.337954 | -0.01242 |
| 24            | 1             | -0.24073                | 4.654701 | -2.45461 |  | 24            | 8             | 1.225807                | 4.790348 | -2.70996 |
| 25            | 1             | 1.271839                | 4.567721 | -2.84486 |  | 25            | 1             | 0.75671                 | 5.155672 | -3.47892 |
| 26            | 8             | 2.48262                 | 5.264623 | -3.91735 |  | 26            | 1             | 1.954534                | 5.407368 | -2.52826 |
| 27            | 1             | 2.693946                | 4.972272 | -4.81789 |  | 27            | 8             | -1.71819                | -0.73741 | -0.90922 |
| 28            | 1             | 3.008256                | 6.064447 | -3.75911 |  | 28            | 1             | -1.7478                 | -1.42828 | -0.22039 |
| 29            | 11            | 1.029989                | 1.364118 | 0.417622 |  | 29            | 1             | -2.39866                | -0.97741 | -1.5564  |
|               |               |                         |          |          |  |               |               |                         |          |          |
| <b>Na4_f</b>  |               |                         |          |          |  | <b>K4_f</b>   |               |                         |          |          |
| Center Number | Atomic Number | Coordinates (Angstroms) |          |          |  | Center Number | Atomic Number | Coordinates (Angstroms) |          |          |
|               |               | X                       | Y        | Z        |  |               |               | X                       | Y        | Z        |
| 1             | 1             | -1.8159                 | -1.04025 | 2.502872 |  | 1             | 1             | -0.72164                | -1.10573 | 2.834197 |
| 2             | 6             | -1.13739                | -1.77636 | 2.079994 |  | 2             | 6             | -0.07337                | -1.70858 | 2.203529 |



|    |    |          |          |          |  |    |    |          |          |          |
|----|----|----------|----------|----------|--|----|----|----------|----------|----------|
| 3  | 6  | 0.632068 | -3.75449 | 1.019515 |  | 3  | 6  | 1.631978 | -3.34247 | 0.594611 |
| 4  | 6  | 0.241977 | -1.50706 | 1.986052 |  | 4  | 6  | 1.203944 | -1.242   | 1.837606 |
| 5  | 6  | -1.61277 | -3.01299 | 1.647071 |  | 5  | 6  | -0.48068 | -2.96936 | 1.769604 |
| 6  | 6  | -0.73464 | -3.99126 | 1.11905  |  | 6  | 6  | 0.365765 | -3.7778  | 0.971396 |
| 7  | 6  | 1.105175 | -2.51286 | 1.464359 |  | 7  | 6  | 2.039365 | -2.0785  | 1.041328 |
| 8  | 1  | 1.305742 | -4.51379 | 0.631665 |  | 8  | 1  | 2.285945 | -3.97166 | -0.00317 |
| 9  | 1  | -2.66769 | -3.25191 | 1.758891 |  | 9  | 1  | -1.44274 | -3.36251 | 2.089995 |
| 10 | 1  | -1.13343 | -4.9527  | 0.807991 |  | 10 | 1  | 0.02882  | -4.765   | 0.667568 |
| 11 | 1  | 0.769611 | 0.511531 | 2.87009  |  | 11 | 1  | 1.668907 | 0.764251 | 2.778881 |
| 12 | 7  | 2.392684 | -2.01446 | 1.51825  |  | 12 | 7  | 3.234512 | -1.40999 | 0.862517 |
| 13 | 1  | 3.226786 | -2.51858 | 1.251005 |  | 13 | 1  | 4.044316 | -1.7784  | 0.383521 |
| 14 | 6  | 2.376775 | -0.74862 | 2.062827 |  | 14 | 6  | 3.192296 | -0.20214 | 1.530417 |
| 15 | 6  | 1.077361 | -0.38925 | 2.352392 |  | 15 | 6  | 1.962268 | -0.0518  | 2.130011 |
| 16 | 1  | 3.302413 | -0.21695 | 2.239796 |  | 16 | 1  | 4.063409 | 0.439265 | 1.556099 |
| 17 | 8  | -1.94108 | -1.40269 | -1.20911 |  | 17 | 19 | 0.775566 | 1.637286 | -0.46085 |
| 18 | 1  | -2.61945 | -1.78266 | -1.79093 |  | 18 | 8  | -1.75155 | -1.46154 | -0.82328 |
| 19 | 1  | -1.89497 | -1.98211 | -0.41917 |  | 19 | 1  | -2.47444 | -1.99175 | -1.19641 |
| 20 | 8  | 0.69378  | -0.61074 | -1.75859 |  | 20 | 1  | -1.3708  | -1.992   | -0.09064 |
| 21 | 1  | 1.251758 | -0.99394 | -2.45086 |  | 21 | 8  | 0.401372 | -0.30203 | -2.24329 |
| 22 | 1  | -0.17997 | -1.0542  | -1.81013 |  | 22 | 1  | 0.712576 | -0.67724 | -3.08004 |
| 23 | 8  | -1.51442 | 1.173964 | -0.17249 |  | 23 | 1  | -0.35348 | -0.85531 | -1.94961 |
| 24 | 1  | -1.95739 | 0.395864 | -0.57216 |  | 24 | 8  | -1.78441 | 1.198988 | 0.136597 |
| 25 | 1  | -2.18274 | 1.86796  | -0.07422 |  | 25 | 1  | -2.03776 | 0.299808 | -0.16074 |
| 26 | 11 | 0.732443 | 0.910721 | -0.08957 |  | 26 | 1  | -2.59107 | 1.623819 | 0.463733 |
| 27 | 8  | 1.998272 | 2.803905 | -0.3331  |  | 27 | 8  | 1.725272 | 4.116884 | -1.10016 |
| 28 | 1  | 2.515017 | 3.31218  | 0.312292 |  | 28 | 1  | 2.194409 | 4.765761 | -0.55145 |
| 29 | 1  | 2.038887 | 3.317082 | -1.15628 |  | 29 | 1  | 1.593276 | 4.560702 | -1.95357 |
|    |    |          |          |          |  |    |    |          |          |          |

**Na4\_g**

**K4\_g**

| Center Number | Atomic Number | Coordinates (Angstroms) |          |          | Center Number | Atomic Number | Coordinates (Angstroms) |          |          |
|---------------|---------------|-------------------------|----------|----------|---------------|---------------|-------------------------|----------|----------|
|               |               | X                       | Y        | Z        |               |               | X                       | Y        | Z        |
| 1             | 1             | -2.09614                | 0.316375 | 1.728856 | 1             | 1             | -2.09013                | 0.280669 | 1.735759 |
| 2             | 6             | -1.62493                | 0.028756 | 0.792503 | 2             | 6             | -1.63029                | -0.07398 | 0.816675 |
| 3             | 6             | -0.43628                | -0.74692 | -1.68877 | 3             | 6             | -0.47987                | -1.04888 | -1.61029 |
| 4             | 6             | -0.55676                | -0.89181 | 0.78381  | 4             | 6             | -0.47028                | -0.87373 | 0.862232 |
| 5             | 6             | -2.08379                | 0.546766 | -0.41855 | 5             | 6             | -2.19607                | 0.228929 | -0.4204  |
| 6             | 6             | -1.4924                 | 0.164584 | -1.64802 | 6             | 6             | -1.62422                | -0.25158 | -1.62289 |
| 7             | 6             | 0.014621                | -1.273   | -0.46904 | 7             | 6             | 0.080721                | -1.35824 | -0.36257 |
| 8             | 1             | 0.001085                | -1.05312 | -2.63553 | 8             | 1             | -0.06073                | -1.44023 | -2.53388 |
| 9             | 1             | -2.92383                | 1.235864 | -0.42544 | 9             | 1             | -3.1087                 | 0.817423 | -0.46501 |
| 10            | 1             | -1.88233                | 0.571334 | -2.57672 | 10            | 1             | -2.10252                | -0.02119 | -2.571   |
| 11            | 1             | -0.03707                | -1.59801 | 2.868978 | 11            | 1             | 0.201716                | -1.26273 | 2.987525 |
| 12            | 7             | 1.015646                | -2.18211 | -0.19864 | 12            | 7             | 1.177588                | -2.1304  | -0.03772 |
| 13            | 1             | 1.576011                | -2.66193 | -0.88919 | 13            | 1             | 1.749143                | -2.64453 | -0.6933  |
| 14            | 6             | 1.090736                | -2.39109 | 1.164317 | 14            | 6             | 1.329941                | -2.15811 | 1.334502 |
| 15            | 6             | 0.154519                | -1.61399 | 1.804307 | 15            | 6             | 0.350599                | -1.39366 | 1.923836 |

|               |               |                         |          |          |  |               |               |                         |          |          |
|---------------|---------------|-------------------------|----------|----------|--|---------------|---------------|-------------------------|----------|----------|
| 16            | 1             | 1.802164                | -3.09726 | 1.570703 |  | 16            | 1             | 2.121872                | -2.74106 | 1.785097 |
| 17            | 8             | 0.496665                | 3.783301 | -1.29924 |  | 17            | 19            | 0.453476                | 2.141469 | -0.59208 |
| 18            | 1             | 1.133973                | 4.49554  | -1.13994 |  | 18            | 8             | 0.395204                | 4.511745 | -1.77762 |
| 19            | 1             | -0.12458                | 4.123369 | -1.98547 |  | 19            | 1             | 0.99827                 | 5.264707 | -1.6847  |
| 20            | 8             | 1.954305                | 1.238271 | 1.215163 |  | 20            | 1             | -0.29651                | 4.806048 | -2.4134  |
| 21            | 1             | 1.847152                | 0.393034 | 1.683625 |  | 21            | 8             | 2.161722                | 1.369839 | 1.241363 |
| 22            | 1             | 2.743146                | 1.681564 | 1.601128 |  | 22            | 1             | 1.970371                | 0.511099 | 1.657874 |
| 23            | 8             | -1.30652                | 4.632653 | -3.21643 |  | 23            | 1             | 2.960738                | 1.722782 | 1.689432 |
| 24            | 1             | -1.08988                | 4.726705 | -4.15751 |  | 24            | 8             | -1.62522                | 5.217326 | -3.56169 |
| 25            | 1             | -2.01821                | 5.267796 | -3.03874 |  | 25            | 1             | -1.49966                | 5.2901   | -4.52094 |
| 26            | 11            | 0.417806                | 1.80365  | -0.28412 |  | 26            | 1             | -2.35841                | 5.812931 | -3.34043 |
| 27            | 8             | 4.146515                | 2.597499 | 2.247058 |  | 27            | 8             | 4.422952                | 2.451622 | 2.501868 |
| 28            | 1             | 5.073628                | 2.428755 | 2.016916 |  | 28            | 1             | 5.352381                | 2.270226 | 2.292788 |
| 29            | 1             | 4.158459                | 3.043074 | 3.108675 |  | 29            | 1             | 4.421714                | 2.908142 | 3.357526 |
|               |               |                         |          |          |  |               |               |                         |          |          |
| <b>Na4_h</b>  |               |                         |          |          |  | <b>K4_h</b>   |               |                         |          |          |
| Center Number | Atomic Number | Coordinates (Angstroms) |          |          |  | Center Number | Atomic Number | Coordinates (Angstroms) |          |          |
|               |               | X                       | Y        | Z        |  |               |               | X                       | Y        | Z        |
| 1             | 1             | 2.465116                | -2.49054 | 0.574423 |  | 1             | 1             | 2.149381                | -2.26682 | 0.702563 |
| 2             | 6             | 1.926953                | -1.82455 | 1.243181 |  | 2             | 6             | 1.576653                | -1.64882 | 1.38982  |
| 3             | 6             | 0.547895                | -0.07464 | 3.034802 |  | 3             | 6             | 0.13503                 | -0.02665 | 3.247443 |
| 4             | 6             | 0.607364                | -2.12393 | 1.640633 |  | 4             | 6             | 0.414728                | -2.15194 | 2.006109 |
| 5             | 6             | 2.536199                | -0.66924 | 1.73201  |  | 5             | 6             | 2.002883                | -0.35946 | 1.704342 |
| 6             | 6             | 1.850162                | 0.20096  | 2.616704 |  | 6             | 6             | 1.286455                | 0.443803 | 2.624008 |
| 7             | 6             | -0.05512                | -1.24451 | 2.549991 |  | 7             | 6             | -0.2827                 | -1.32652 | 2.934912 |
| 8             | 1             | 0.032903                | 0.583244 | 3.72963  |  | 8             | 1             | -0.40375                | 0.586368 | 3.96501  |
| 9             | 1             | 3.563125                | -0.44465 | 1.456557 |  | 9             | 1             | 2.923087                | 0.022838 | 1.269364 |
| 10            | 1             | 2.358469                | 1.081258 | 3.000385 |  | 10            | 1             | 1.654867                | 1.437313 | 2.864327 |
| 11            | 1             | -0.11192                | -4.0813  | 0.762268 |  | 11            | 1             | 0.011446                | -4.30249 | 1.420317 |
| 12            | 7             | -1.29881                | -1.78252 | 2.802878 |  | 12            | 7             | -1.34817                | -2.06338 | 3.415534 |
| 13            | 1             | -1.99112                | -1.39131 | 3.426357 |  | 13            | 1             | -2.00684                | -1.75215 | 4.115529 |
| 14            | 6             | -1.44266                | -2.96128 | 2.099993 |  | 14            | 6             | -1.3382                 | -3.31694 | 2.842385 |
| 15            | 6             | -0.30516                | -3.20306 | 1.36443  |  | 15            | 6             | -0.28306                | -3.41231 | 1.961615 |
| 16            | 1             | -2.34226                | -3.55323 | 2.203755 |  | 16            | 1             | -2.07385                | -4.05656 | 3.129192 |
| 17            | 8             | -1.876                  | -1.6342  | -1.29108 |  | 17            | 8             | -2.17067                | -2.71966 | -0.59801 |
| 18            | 1             | -2.59847                | -2.01651 | -1.84481 |  | 18            | 1             | -2.90344                | -3.35412 | -0.62448 |
| 19            | 1             | -1.70636                | -2.27408 | -0.57364 |  | 19            | 1             | -1.7053                 | -2.89954 | 0.245416 |
| 20            | 8             | 0.60952                 | -0.6078  | -1.95275 |  | 20            | 8             | 0.173926                | -1.62349 | -4.44467 |
| 21            | 1             | 1.113353                | -0.7715  | -2.76306 |  | 21            | 1             | 1.021311                | -1.22373 | -4.69813 |
| 22            | 1             | -0.24535                | -1.08833 | -2.02682 |  | 22            | 1             | 0.068931                | -2.38729 | -5.03408 |
| 23            | 8             | -1.59529                | 0.807251 | -0.02236 |  | 23            | 8             | 0.209201                | 0.762228 | -0.84014 |
| 24            | 1             | -1.98775                | 0.054389 | -0.52075 |  | 24            | 1             | 0.343465                | 1.722053 | -0.81049 |
| 25            | 1             | -2.22367                | 1.542972 | -0.06138 |  | 25            | 1             | 0.681842                | 0.414248 | -0.05798 |
| 26            | 11            | 0.625877                | 0.43976  | 0.031258 |  | 26            | 8             | -3.412                  | 0.484012 | -3.58994 |
| 27            | 8             | -3.89293                | -2.76406 | -2.80454 |  | 27            | 1             | -3.46355                | 0.684892 | -4.53808 |
| 28            | 1             | -3.76137                | -3.30259 | -3.60064 |  | 28            | 1             | -4.22259                | 0.857178 | -3.20842 |

| 29            | 1             | -4.82646                | -2.50055 | -2.80638 |  | 29            | 19            | -1.366                  | -0.82012 | -2.32476 |
|---------------|---------------|-------------------------|----------|----------|--|---------------|---------------|-------------------------|----------|----------|
|               |               |                         |          |          |  |               |               |                         |          |          |
| <b>Na5_a</b>  |               |                         |          |          |  | <b>K5_a</b>   |               |                         |          |          |
| Center Number | Atomic Number | Coordinates (Angstroms) |          |          |  | Center Number | Atomic Number | Coordinates (Angstroms) |          |          |
|               |               | X                       | Y        | Z        |  |               |               | X                       | Y        | Z        |
| 1             | 1             | 2.395132                | -2.08534 | 1.378047 |  | 1             | 1             | 4.381763                | -1.53663 | -9.014   |
| 2             | 6             | 1.660493                | -1.48777 | 1.912275 |  | 2             | 6             | 3.647409                | -2.01594 | -8.37123 |
| 3             | 6             | -0.22065                | 0.085812 | 3.376782 |  | 3             | 6             | 1.772091                | -3.34253 | -6.67265 |
| 4             | 6             | 0.418055                | -2.04135 | 2.280275 |  | 4             | 6             | 2.444473                | -2.51614 | -8.91249 |
| 5             | 6             | 1.945782                | -0.17218 | 2.274139 |  | 5             | 6             | 3.898584                | -2.1772  | -7.00966 |
| 6             | 6             | 1.011823                | 0.606972 | 2.998081 |  | 6             | 6             | 2.968351                | -2.83225 | -6.16763 |
| 7             | 6             | -0.50017                | -1.23891 | 3.016431 |  | 7             | 6             | 1.524774                | -3.18258 | -8.04401 |
| 8             | 1             | -0.93028                | 0.68149  | 3.944793 |  | 8             | 1             | 1.074171                | -3.8716  | -6.02847 |
| 9             | 1             | 2.915473                | 0.253679 | 2.02871  |  | 9             | 1             | 4.836404                | -1.82292 | -6.59015 |
| 10            | 1             | 1.270188                | 1.624086 | 3.278847 |  | 10            | 1             | 3.203454                | -2.96772 | -5.1155  |
| 11            | 1             | 0.246191                | -4.21526 | 1.666908 |  | 11            | 1             | 2.314773                | -2.1709  | -11.1433 |
| 12            | 7             | -1.61072                | -2.02088 | 3.271949 |  | 12            | 7             | 0.460963                | -3.5945  | -8.81984 |
| 13            | 1             | -2.42145                | -1.73146 | 3.800759 |  | 13            | 1             | -0.31373                | -4.1593  | -8.50095 |
| 14            | 6             | -1.42281                | -3.27793 | 2.740143 |  | 14            | 6             | 0.685304                | -3.23127 | -10.1355 |
| 15            | 6             | -0.19794                | -3.33348 | 2.111266 |  | 15            | 6             | 1.87842                 | -2.56004 | -10.2333 |
| 16            | 1             | -2.17199                | -4.04704 | 2.872251 |  | 16            | 1             | -0.0301                 | -3.49281 | -10.9033 |
| 17            | 8             | -1.35688                | -2.5987  | -0.81734 |  | 17            | 8             | 2.056695                | 2.427831 | -5.34915 |
| 18            | 1             | -1.89534                | -3.35676 | -1.09104 |  | 18            | 1             | 2.018787                | 2.862687 | -6.23281 |
| 19            | 1             | -1.09914                | -2.78118 | 0.110528 |  | 19            | 1             | 2.664116                | 2.943714 | -4.79707 |
| 20            | 8             | -0.02094                | -1.38016 | -4.19394 |  | 20            | 8             | 1.812271                | 2.764661 | -8.05077 |
| 21            | 1             | 0.734707                | -1.88587 | -4.52814 |  | 21            | 1             | 2.228891                | 3.400597 | -8.65231 |
| 22            | 1             | -0.47864                | -1.00261 | -4.97122 |  | 22            | 1             | 0.928159                | 2.535756 | -8.42352 |
| 23            | 8             | 0.594876                | 0.379781 | -0.72989 |  | 23            | 8             | -0.1477                 | 0.925445 | -4.79305 |
| 24            | 1             | 0.895707                | 1.295086 | -0.83486 |  | 24            | 1             | 0.546862                | 1.619754 | -4.70662 |
| 25            | 1             | 0.935352                | 0.092506 | 0.140803 |  | 25            | 1             | -0.34147                | 0.600617 | -3.89979 |
| 26            | 11            | -0.75419                | -0.82045 | -2.0979  |  | 26            | 8             | -2.20508                | 1.60047  | -6.54823 |
| 27            | 8             | -2.37221                | 0.402844 | -3.16094 |  | 27            | 1             | -1.63422                | 1.4563   | -5.76145 |
| 28            | 1             | -2.37839                | 0.418943 | -4.1389  |  | 28            | 1             | -2.84474                | 2.29499  | -6.33082 |
| 29            | 1             | -3.12794                | 0.931322 | -2.86441 |  | 29            | 8             | -0.4464                 | 1.34274  | -8.54796 |
| 30            | 8             | -1.80371                | 0.023392 | -5.94411 |  | 30            | 1             | -1.20985                | 1.514822 | -7.93196 |
| 31            | 1             | -2.41671                | -0.47282 | -6.51221 |  | 31            | 1             | -0.8287                 | 1.11158  | -9.40861 |
| 32            | 1             | -1.48666                | 0.766435 | -6.48458 |  | 32            | 19            | 1.515515                | 0.028274 | -6.98053 |
|               |               |                         |          |          |  |               |               |                         |          |          |
| <b>Na5_b</b>  |               |                         |          |          |  | <b>K5_b</b>   |               |                         |          |          |
| Center Number | Atomic Number | Coordinates (Angstroms) |          |          |  | Center Number | Atomic Number | Coordinates (Angstroms) |          |          |
|               |               | X                       | Y        | Z        |  |               |               | X                       | Y        | Z        |
| 1             | 1             | 2.379074                | -1.84906 | 0.087736 |  | 1             | 1             | 2.40711                 | -2.35007 | 0.329414 |
| 2             | 6             | 1.796388                | -1.33011 | 0.844979 |  | 2             | 6             | 1.858719                | -1.73589 | 1.039292 |
| 3             | 6             | 0.313778                | 0.016833 | 2.882091 |  | 3             | 6             | 0.458581                | -0.14123 | 2.951809 |
| 4             | 6             | 0.53739                 | -1.82507 | 1.240808 |  | 4             | 6             | 0.526702                | -2.05095 | 1.375151 |
| 5             | 6             | 2.293879                | -0.18099 | 1.45785  |  | 5             | 6             | 2.470425                | -0.64507 | 1.652473 |

|    |    |          |          |          |  |    |    |          |          |          |
|----|----|----------|----------|----------|--|----|----|----------|----------|----------|
| 6  | 6  | 1.556499 | 0.488085 | 2.464549 |  | 6  | 6  | 1.775401 | 0.146889 | 2.597069 |
| 7  | 6  | -0.17975 | -1.14151 | 2.267093 |  | 7  | 6  | -0.14945 | -1.24624 | 2.339415 |
| 8  | 1  | -0.24179 | 0.523437 | 3.666899 |  | 8  | 1  | -0.06383 | 0.45466  | 3.695863 |
| 9  | 1  | 3.275167 | 0.194887 | 1.180386 |  | 9  | 1  | 3.506411 | -0.41011 | 1.423249 |
| 10 | 1  | 1.97712  | 1.372344 | 2.934786 |  | 10 | 1  | 2.285656 | 0.97899  | 3.074475 |
| 11 | 1  | -0.02761 | -3.70049 | 0.104435 |  | 11 | 1  | -0.20059 | -3.90122 | 0.291592 |
| 12 | 7  | -1.36129 | -1.82789 | 2.46333  |  | 12 | 7  | -1.41282 | -1.78062 | 2.501952 |
| 13 | 1  | -2.06816 | -1.59659 | 3.147248 |  | 13 | 1  | -2.11332 | -1.44612 | 3.148598 |
| 14 | 6  | -1.41537 | -2.90723 | 1.606294 |  | 14 | 6  | -1.55304 | -2.88649 | 1.688998 |
| 15 | 6  | -0.27817 | -2.93887 | 0.831231 |  | 15 | 6  | -0.39448 | -3.08232 | 0.97205  |
| 16 | 1  | -2.25889 | -3.58394 | 1.629305 |  | 16 | 1  | -2.46873 | -3.46227 | 1.70059  |
| 17 | 8  | 2.016422 | 1.720245 | -2.08059 |  | 17 | 19 | 0.530546 | 1.074149 | -0.44028 |
| 18 | 1  | 2.585314 | 1.29237  | -2.73682 |  | 18 | 8  | 2.285696 | 2.14569  | -2.16421 |
| 19 | 1  | 2.063823 | 2.688477 | -2.2424  |  | 19 | 1  | 3.004114 | 1.859545 | -2.7472  |
| 20 | 8  | -1.10466 | -0.38778 | -1.07408 |  | 20 | 1  | 2.196321 | 3.116429 | -2.28551 |
| 21 | 1  | -1.80912 | -0.36604 | -1.73936 |  | 21 | 8  | -1.28391 | -0.7787  | -1.17277 |
| 22 | 1  | -1.14086 | -1.26988 | -0.65649 |  | 22 | 1  | -1.96923 | -0.90622 | -1.84623 |
| 23 | 8  | 0.028418 | 3.245221 | -0.2114  |  | 23 | 1  | -1.2697  | -1.59874 | -0.64156 |
| 24 | 1  | 0.519462 | 3.874848 | -0.78466 |  | 24 | 8  | -0.17121 | 3.666587 | -0.37812 |
| 25 | 1  | -0.5834  | 3.76689  | 0.327819 |  | 25 | 1  | 0.371997 | 4.241075 | -0.96155 |
| 26 | 8  | 1.746369 | 4.5066   | -2.02753 |  | 26 | 1  | -0.82759 | 4.242529 | 0.04054  |
| 27 | 1  | 1.416478 | 5.021352 | -2.80392 |  | 27 | 8  | 1.665705 | 4.896472 | -2.13135 |
| 28 | 1  | 2.489357 | 5.016729 | -1.66704 |  | 28 | 1  | 1.360413 | 5.354224 | -2.9515  |
| 29 | 8  | 0.868485 | 5.975976 | -4.18847 |  | 29 | 1  | 2.322959 | 5.485782 | -1.72795 |
| 30 | 1  | 1.200809 | 5.919163 | -5.09789 |  | 30 | 8  | 0.863902 | 6.234095 | -4.40961 |
| 31 | 1  | 0.238422 | 6.713166 | -4.17213 |  | 31 | 1  | 1.251101 | 6.15367  | -5.29518 |
| 32 | 11 | 0.555636 | 1.055031 | -0.47331 |  | 32 | 1  | 0.125352 | 6.857682 | -4.48874 |
|    |    |          |          |          |  |    |    |          |          |          |

**Na5\_c**

**K5\_c**

| Center Number | Atomic Number | Coordinates (Angstroms) |          |          | Center Number | Atomic Number | Coordinates (Angstroms) |          |          |
|---------------|---------------|-------------------------|----------|----------|---------------|---------------|-------------------------|----------|----------|
|               |               | X                       | Y        | Z        |               |               | X                       | Y        | Z        |
| 1             | 1             | -1.48341                | -0.27827 | 2.115466 | 1             | 1             | -1.67481                | -1.64446 | 2.264465 |
| 2             | 6             | -0.8471                 | -1.0698  | 1.727128 | 2             | 6             | -0.97942                | -2.15869 | 1.605828 |
| 3             | 6             | 0.80476                 | -3.19221 | 0.761145 | 3             | 6             | 0.840711                | -3.56729 | -0.08795 |
| 4             | 6             | 0.542004                | -0.87145 | 1.588    | 4             | 6             | 0.353909                | -1.71648 | 1.486417 |
| 5             | 6             | -1.39014                | -2.30219 | 1.373478 | 5             | 6             | -1.38462                | -3.27953 | 0.885426 |
| 6             | 6             | -0.57102                | -3.3525  | 0.894037 | 6             | 6             | -0.48146                | -3.9772  | 0.047548 |
| 7             | 6             | 1.346112                | -1.9495  | 1.114256 | 7             | 6             | 1.244082                | -2.43876 | 0.638859 |
| 8             | 1             | 1.432022                | -4.00534 | 0.405872 | 8             | 1             | 1.534413                | -4.11318 | -0.7219  |
| 9             | 1             | -2.45641                | -2.47368 | 1.493359 | 9             | 1             | -2.40123                | -3.64867 | 0.993329 |
| 10            | 1             | -1.02347                | -4.30736 | 0.642051 | 10            | 1             | -0.82386                | -4.8582  | -0.48776 |
| 11            | 1             | 1.178349                | 1.1986   | 2.262075 | 11            | 1             | 0.772075                | 0.072288 | 2.812132 |
| 12            | 7             | 2.653017                | -1.5006  | 1.086402 | 12            | 7             | 2.475643                | -1.81215 | 0.712783 |
| 13            | 1             | 3.457008                | -2.05701 | 0.831247 | 13            | 1             | 3.330585                | -2.15665 | 0.298583 |
| 14            | 6             | 2.703761                | -0.19537 | 1.528474 | 14            | 6             | 2.39944                 | -0.75085 | 1.597681 |
| 15            | 6             | 1.432766                | 0.235303 | 1.838052 | 15            | 6             | 1.116102                | -0.64679 | 2.07991  |

|               |               |                         |          |          |  |               |               |                         |          |          |
|---------------|---------------|-------------------------|----------|----------|--|---------------|---------------|-------------------------|----------|----------|
| 16            | 1             | 3.650896                | 0.320687 | 1.608981 |  | 16            | 1             | 3.279068                | -0.16427 | 1.82657  |
| 17            | 8             | 2.111686                | 1.975574 | -2.15081 |  | 17            | 19            | 0.338528                | 0.821543 | -0.7913  |
| 18            | 1             | 2.760064                | 1.679747 | -2.80618 |  | 18            | 8             | 1.999004                | 1.872049 | -2.62192 |
| 19            | 1             | 2.059563                | 2.95535  | -2.21664 |  | 19            | 1             | 2.526192                | 1.592428 | -3.3847  |
| 20            | 8             | -0.76747                | -0.59436 | -1.52879 |  | 20            | 1             | 2.032958                | 2.854172 | -2.60483 |
| 21            | 1             | -1.15731                | -0.8267  | -2.38494 |  | 21            | 8             | -1.68585                | -0.81994 | -1.42397 |
| 22            | 1             | -1.07782                | -1.26553 | -0.89256 |  | 22            | 1             | -2.37564                | -0.92202 | -2.09713 |
| 23            | 8             | -0.15753                | 3.12745  | -0.2788  |  | 23            | 1             | -1.75551                | -1.60461 | -0.84773 |
| 24            | 1             | 0.296728                | 3.848077 | -0.76955 |  | 24            | 8             | 0.097052                | 3.44125  | -0.27475 |
| 25            | 1             | -0.94                   | 3.516641 | 0.138268 |  | 25            | 1             | 0.626228                | 4.020972 | -0.86554 |
| 26            | 8             | 1.52573                 | 4.69695  | -1.87251 |  | 26            | 1             | -0.40304                | 4.02761  | 0.311864 |
| 27            | 1             | 1.179582                | 5.239195 | -2.62302 |  | 27            | 8             | 1.807295                | 4.647929 | -2.16497 |
| 28            | 1             | 2.175013                | 5.256807 | -1.41717 |  | 28            | 1             | 1.439522                | 5.247187 | -2.85881 |
| 29            | 8             | 0.583334                | 6.238302 | -3.95257 |  | 29            | 1             | 2.598891                | 5.092972 | -1.82244 |
| 30            | 1             | 0.974103                | 6.31944  | -4.83658 |  | 30            | 8             | 0.827599                | 6.365386 | -4.09036 |
| 31            | 1             | -0.14729                | 6.875216 | -3.91626 |  | 31            | 1             | 1.054835                | 6.37491  | -5.03316 |
| 32            | 11            | 0.602089                | 1.034978 | -0.74062 |  | 32            | 1             | 0.191113                | 7.084473 | -3.95442 |
|               |               |                         |          |          |  |               |               |                         |          |          |
| <b>Na5_d</b>  |               |                         |          |          |  | <b>K5_d</b>   |               |                         |          |          |
| Center Number | Atomic Number | Coordinates (Angstroms) |          |          |  | Center Number | Atomic Number | Coordinates (Angstroms) |          |          |
|               |               | X                       | Y        | Z        |  |               |               | X                       | Y        | Z        |
| 1             | 1             | 2.338341                | -1.64922 | 0.358572 |  | 1             | 1             | 2.578033                | -1.87588 | 0.379667 |
| 2             | 6             | 1.747243                | -1.36583 | 1.225416 |  | 2             | 6             | 1.999934                | -1.28876 | 1.088096 |
| 3             | 6             | 0.244631                | -0.64213 | 3.545099 |  | 3             | 6             | 0.519073                | 0.256266 | 2.981261 |
| 4             | 6             | 0.564527                | -2.06264 | 1.542058 |  | 4             | 6             | 0.769773                | -1.76891 | 1.578253 |
| 5             | 6             | 2.160352                | -0.32723 | 2.058148 |  | 5             | 6             | 2.475849                | -0.06326 | 1.546463 |
| 6             | 6             | 1.413025                | 0.032508 | 3.205858 |  | 6             | 6             | 1.740906                | 0.702853 | 2.482713 |
| 7             | 6             | -0.16216                | -1.68945 | 2.708744 |  | 7             | 6             | 0.053253                | -0.98518 | 2.528087 |
| 8             | 1             | -0.31724                | -0.37557 | 4.436304 |  | 8             | 1             | -0.03308                | 0.836539 | 3.715775 |
| 9             | 1             | 3.095333                | 0.188528 | 1.85065  |  | 9             | 1             | 3.442919                | 0.298454 | 1.206055 |
| 10            | 1             | 1.773256                | 0.830954 | 3.848788 |  | 10            | 1             | 2.152059                | 1.641775 | 2.84456  |
| 11            | 1             | 0.173585                | -3.76236 | 0.095828 |  | 11            | 1             | 0.295996                | -3.83592 | 0.782166 |
| 12            | 7             | -1.24756                | -2.5397  | 2.802791 |  | 12            | 7             | -1.08084                | -1.69569 | 2.872147 |
| 13            | 1             | -1.92865                | -2.54022 | 3.549314 |  | 13            | 1             | -1.77219                | -1.40403 | 3.548707 |
| 14            | 6             | -1.22462                | -3.43549 | 1.756103 |  | 14            | 6             | -1.09828                | -2.89409 | 2.192315 |
| 15            | 6             | -0.1391                 | -3.17217 | 0.948057 |  | 15            | 6             | 0.008428                | -2.97639 | 1.374571 |
| 16            | 1             | -1.97308                | -4.21333 | 1.683256 |  | 16            | 1             | -1.88841                | -3.61214 | 2.367712 |
| 17            | 8             | -1.73685                | -1.19746 | -0.98406 |  | 17            | 19            | 0.475831                | 1.536533 | -0.5828  |
| 18            | 1             | -2.47965                | -1.5632  | -1.49125 |  | 18            | 8             | -1.72977                | -1.82619 | -1.0827  |
| 19            | 1             | -1.43091                | -1.91162 | -0.38082 |  | 19            | 1             | -2.36608                | -2.45494 | -1.4601  |
| 20            | 8             | 0.620092                | 0.131482 | -1.78463 |  | 20            | 1             | -1.34167                | -2.26435 | -0.29265 |
| 21            | 1             | 0.954057                | 0.181342 | -2.69226 |  | 21            | 8             | 0.401355                | -0.46703 | -2.37458 |
| 22            | 1             | -0.19599                | -0.41115 | -1.80347 |  | 22            | 1             | 0.793448                | -0.78862 | -3.19962 |
| 23            | 8             | -1.44377                | 1.183309 | 0.475087 |  | 23            | 1             | -0.32109                | -1.08675 | -2.14308 |
| 24            | 1             | -1.84299                | 0.419568 | 0.008247 |  | 24            | 8             | -2.11566                | 0.871693 | -0.31506 |
| 25            | 1             | -2.16381                | 1.677144 | 0.89293  |  | 25            | 1             | -2.24574                | -0.05883 | -0.59317 |

|               |               |                         |          |          |  |               |               |                         |          |          |
|---------------|---------------|-------------------------|----------|----------|--|---------------|---------------|-------------------------|----------|----------|
| 26            | 11            | 0.794675                | 1.324466 | 0.150454 |  | 26            | 1             | -2.99681                | 1.255782 | -0.19762 |
| 27            | 8             | 2.077744                | 3.168438 | 0.216544 |  | 27            | 8             | 1.466509                | 4.007391 | -0.81582 |
| 28            | 1             | 2.264716                | 3.76971  | 0.952707 |  | 28            | 1             | 1.921636                | 4.571434 | -0.1727  |
| 29            | 1             | 2.521815                | 3.560148 | -0.57122 |  | 29            | 1             | 1.427716                | 4.537489 | -1.64363 |
| 30            | 8             | 3.288875                | 4.160103 | -2.07099 |  | 30            | 8             | 1.288777                | 5.471902 | -3.18839 |
| 31            | 1             | 4.247292                | 4.137659 | -2.22049 |  | 31            | 1             | 2.018318                | 5.630818 | -3.80753 |
| 32            | 1             | 2.957104                | 4.928214 | -2.56222 |  | 32            | 1             | 0.645611                | 6.181937 | -3.34004 |
|               |               |                         |          |          |  |               |               |                         |          |          |
| <b>Na5_e</b>  |               |                         |          |          |  | <b>K5_e</b>   |               |                         |          |          |
| Center Number | Atomic Number | Coordinates (Angstroms) |          |          |  | Center Number | Atomic Number | Coordinates (Angstroms) |          |          |
|               |               | X                       | Y        | Z        |  |               |               | X                       | Y        | Z        |
| 1             | 1             | 2.307368                | -2.23854 | 0.463855 |  | 1             | 1             | 2.11365                 | -2.6111  | 0.780515 |
| 2             | 6             | 1.770263                | -1.70948 | 1.246411 |  | 2             | 6             | 1.491897                | -1.81005 | 1.172529 |
| 3             | 6             | 0.403761                | -0.33666 | 3.346622 |  | 3             | 6             | -0.0853                 | 0.315164 | 2.248772 |
| 4             | 6             | 0.488182                | -2.13507 | 1.645485 |  | 4             | 6             | 0.325773                | -2.10327 | 1.904623 |
| 5             | 6             | 2.348188                | -0.6145  | 1.888323 |  | 5             | 6             | 1.854994                | -0.47707 | 0.98734  |
| 6             | 6             | 1.668564                | 0.067073 | 2.92771  |  | 6             | 6             | 1.071117                | 0.575206 | 1.519338 |
| 7             | 6             | -0.16901                | -1.4413  | 2.703295 |  | 7             | 6             | -0.43923                | -1.02666 | 2.439907 |
| 8             | 1             | -0.10712                | 0.177211 | 4.156546 |  | 8             | 1             | -0.67442                | 1.124289 | 2.672201 |
| 9             | 1             | 3.357766                | -0.30858 | 1.622605 |  | 9             | 1             | 2.777322                | -0.2395  | 0.462877 |
| 10            | 1             | 2.154126                | 0.900625 | 3.427854 |  | 10            | 1             | 1.391653                | 1.603627 | 1.377095 |
| 11            | 1             | -0.18031                | -3.97263 | 0.505082 |  | 11            | 1             | 0.030154                | -4.33413 | 2.159257 |
| 12            | 7             | -1.37937                | -2.07111 | 2.91309  |  | 12            | 7             | -1.49313                | -1.58348 | 3.139016 |
| 13            | 1             | -2.04914                | -1.83038 | 3.630214 |  | 13            | 1             | -2.18872                | -1.06766 | 3.659432 |
| 14            | 6             | -1.5013                 | -3.1365  | 2.044361 |  | 14            | 6             | -1.41142                | -2.95844 | 3.079103 |
| 15            | 6             | -0.38599                | -3.20561 | 1.240575 |  | 15            | 6             | -0.32074                | -3.32263 | 2.320355 |
| 16            | 1             | -2.36971                | -3.78034 | 2.085677 |  | 16            | 1             | -2.12808                | -3.57312 | 3.607358 |
| 17            | 8             | -1.82878                | -1.36931 | -1.1205  |  | 17            | 8             | -3.37579                | 0.178705 | -3.17249 |
| 18            | 1             | -2.6075                 | -1.68935 | -1.63385 |  | 18            | 1             | -4.21412                | 0.64047  | -3.32042 |
| 19            | 1             | -1.66182                | -2.02981 | -0.41886 |  | 19            | 1             | -2.66118                | 0.764514 | -3.50454 |
| 20            | 8             | 0.68191                 | -0.51729 | -1.93013 |  | 20            | 8             | -0.04953                | -1.4976  | -4.25929 |
| 21            | 1             | 1.083126                | -0.73546 | -2.78358 |  | 21            | 1             | 0.515888                | -1.94619 | -4.90725 |
| 22            | 1             | -0.20792                | -0.93686 | -1.90388 |  | 22            | 1             | 0.485576                | -1.3373  | -3.45236 |
| 23            | 8             | -1.26764                | 1.065882 | 0.056285 |  | 23            | 8             | 0.070723                | -0.48578 | -1.7717  |
| 24            | 1             | -1.73282                | 0.298682 | -0.34865 |  | 24            | 1             | -0.09044                | 0.421188 | -2.09794 |
| 25            | 1             | -1.93722                | 1.637412 | 0.457806 |  | 25            | 1             | 0.563047                | -0.41339 | -0.93027 |
| 26            | 11            | 0.966227                | 0.820478 | -0.11932 |  | 26            | 8             | -2.28606                | -3.72449 | -0.27002 |
| 27            | 8             | 2.261638                | 2.685149 | -0.42889 |  | 27            | 1             | -1.77542                | -3.575   | 0.553272 |
| 28            | 1             | 3.05119                 | 2.991193 | 0.044944 |  | 28            | 1             | -2.78999                | -4.53778 | -0.11139 |
| 29            | 1             | 2.088692                | 3.358235 | -1.10635 |  | 29            | 19            | -2.18137                | -2.04315 | -2.35592 |
| 30            | 8             | -4.02067                | -2.32979 | -2.52469 |  | 30            | 8             | -0.86699                | 1.156323 | -3.90559 |
| 31            | 1             | -3.96971                | -2.8804  | -3.32168 |  | 31            | 1             | -0.5517                 | 0.372857 | -4.40757 |
| 32            | 1             | -4.90858                | -1.93938 | -2.52192 |  | 32            | 1             | -0.62041                | 1.944266 | -4.41497 |
|               |               |                         |          |          |  |               |               |                         |          |          |
| <b>Na5_f</b>  |               |                         |          |          |  | <b>K5_f</b>   |               |                         |          |          |
| Center Number | Atomic Number | Coordinates (Angstroms) |          |          |  | Center Number | Atomic Number | Coordinates (Angstroms) |          |          |

|    |    |          |          |          |  |    |    |          |          |          |
|----|----|----------|----------|----------|--|----|----|----------|----------|----------|
| 1  | 1  | 2.218155 | -2.13692 | 0.760527 |  | 1  | 1  | 2.586591 | -1.95291 | 0.491193 |
| 2  | 6  | 1.62433  | -1.55573 | 1.461823 |  | 2  | 6  | 1.997704 | -1.34188 | 1.169915 |
| 3  | 6  | 0.122407 | -0.03625 | 3.358717 |  | 3  | 6  | 0.486697 | 0.267031 | 2.984333 |
| 4  | 6  | 0.432421 | -2.08206 | 1.996814 |  | 4  | 6  | 0.748491 | -1.7947  | 1.637517 |
| 5  | 6  | 2.049234 | -0.2936  | 1.874607 |  | 5  | 6  | 2.476846 | -0.1115  | 1.61158  |
| 6  | 6  | 1.302451 | 0.459264 | 2.813061 |  | 6  | 6  | 1.726925 | 0.686745 | 2.508348 |
| 7  | 6  | -0.29501 | -1.30865 | 2.94706  |  | 7  | 6  | 0.017301 | -0.97953 | 2.549004 |
| 8  | 1  | -0.43958 | 0.536707 | 4.091453 |  | 8  | 1  | -0.07807 | 0.872201 | 3.68857  |
| 9  | 1  | 2.989711 | 0.105475 | 1.502781 |  | 9  | 1  | 3.456891 | 0.230643 | 1.288507 |
| 10 | 1  | 1.670327 | 1.431179 | 3.129975 |  | 10 | 1  | 2.139034 | 1.631001 | 2.854685 |
| 11 | 1  | 0.024752 | -4.18048 | 1.246814 |  | 11 | 1  | 0.267536 | -3.8727  | 0.875395 |
| 12 | 7  | -1.38936 | -2.05928 | 3.331025 |  | 12 | 7  | -1.13502 | -1.66696 | 2.878602 |
| 13 | 1  | -2.07639 | -1.78379 | 4.018749 |  | 13 | 1  | -1.84134 | -1.34965 | 3.527571 |
| 14 | 6  | -1.37167 | -3.27082 | 2.674415 |  | 14 | 6  | -1.1507  | -2.8806  | 2.225931 |
| 15 | 6  | -0.28008 | -3.32438 | 1.835275 |  | 15 | 6  | -0.02349 | -2.99652 | 1.441056 |
| 16 | 1  | -2.13026 | -4.01517 | 2.876522 |  | 16 | 1  | -1.95507 | -3.58393 | 2.396216 |
| 17 | 8  | -1.93606 | -2.22006 | -0.71091 |  | 17 | 19 | 0.552269 | 1.45002  | -0.59024 |
| 18 | 1  | -2.71524 | -2.77363 | -0.87207 |  | 18 | 8  | -1.70521 | -1.87796 | -1.07805 |
| 19 | 1  | -1.53498 | -2.55902 | 0.116699 |  | 19 | 1  | -2.34398 | -2.50455 | -1.45488 |
| 20 | 8  | 0.782915 | -0.55064 | -3.21747 |  | 20 | 1  | -1.34098 | -2.30449 | -0.27069 |
| 21 | 1  | 1.397597 | 0.023742 | -2.73122 |  | 21 | 8  | 0.479716 | -0.58444 | -2.34552 |
| 22 | 1  | 1.260805 | -0.89439 | -3.98728 |  | 22 | 1  | 0.876671 | -0.91566 | -3.16442 |
| 23 | 8  | 0.337859 | 0.779835 | -0.71716 |  | 23 | 1  | -0.25896 | -1.18796 | -2.12309 |
| 24 | 1  | 0.205964 | 1.718475 | -0.51027 |  | 24 | 8  | -2.06038 | 0.844848 | -0.37981 |
| 25 | 1  | 0.7755   | 0.402881 | 0.07426  |  | 25 | 1  | -2.19917 | -0.08889 | -0.64257 |
| 26 | 11 | -1.13489 | -0.5261  | -1.98296 |  | 26 | 1  | -2.93747 | 1.247777 | -0.30131 |
| 27 | 8  | -2.76071 | 0.443483 | -3.20007 |  | 27 | 8  | 1.578846 | 3.851814 | -1.15006 |
| 28 | 1  | -2.60648 | 0.942889 | -4.01591 |  | 28 | 1  | 2.328315 | 4.276827 | -0.67549 |
| 29 | 1  | -3.73857 | 0.391365 | -3.09742 |  | 29 | 1  | 1.33316  | 4.471693 | -1.85328 |
| 30 | 8  | -5.51536 | 0.233553 | -2.87085 |  | 30 | 8  | 3.72098  | 4.954047 | 0.27231  |
| 31 | 1  | -6.05248 | 0.930576 | -2.46235 |  | 31 | 1  | 4.625644 | 4.984871 | -0.07679 |
| 32 | 1  | -6.09588 | -0.21634 | -3.50477 |  | 32 | 1  | 3.635008 | 5.719713 | 0.861818 |

| Na5_g         |               |                         |          |          | K5_g          |               |                         |          |          |
|---------------|---------------|-------------------------|----------|----------|---------------|---------------|-------------------------|----------|----------|
| Center Number | Atomic Number | Coordinates (Angstroms) |          |          | Center Number | Atomic Number | Coordinates (Angstroms) |          |          |
|               |               | X                       | Y        | Z        |               |               | X                       | Y        | Z        |
| 1             | 1             | 2.374064                | -1.9393  | 0.168016 | 1             | 1             | 2.304345                | -2.23602 | 1.025113 |
| 2             | 6             | 1.78824                 | -1.3769  | 0.891096 | 2             | 6             | 1.644921                | -1.61471 | 1.626118 |
| 3             | 6             | 0.301896                | 0.094029 | 2.83676  | 3             | 6             | -0.03511                | 0.020055 | 3.258817 |
| 4             | 6             | 0.608014                | -1.9242  | 1.433025 | 4             | 6             | 0.42049                 | -2.12227 | 2.102038 |
| 5             | 6             | 2.207281                | -0.11696 | 1.316127 | 5             | 6             | 2.01363                 | -0.31452 | 1.96676  |
| 6             | 6             | 1.468021                | 0.612978 | 2.277965 | 6             | 6             | 1.179431                | 0.494893 | 2.774708 |
| 7             | 6             | -0.11207                | -1.17499 | 2.410833 | 7             | 6             | -0.39658                | -1.29035 | 2.920598 |
| 8             | 1             | -0.25335                | 0.649451 | 3.588187 | 8             | 1             | -0.66687                | 0.638683 | 3.890632 |
| 9             | 1             | 3.130583                | 0.303102 | 0.925815 | 9             | 1             | 2.975376                | 0.073573 | 1.640245 |

|    |    |          |          |          |  |    |    |          |          |          |
|----|----|----------|----------|----------|--|----|----|----------|----------|----------|
| 10 | 1  | 1.828045 | 1.585435 | 2.601599 |  | 10 | 1  | 1.502488 | 1.4984   | 3.037391 |
| 11 | 1  | 0.168081 | -3.97921 | 0.592925 |  | 11 | 1  | 0.116072 | -4.28636 | 1.507135 |
| 12 | 7  | -1.20444 | -1.93309 | 2.779588 |  | 12 | 7  | -1.50638 | -2.03264 | 3.276722 |
| 13 | 1  | -1.88602 | -1.67868 | 3.480482 |  | 13 | 1  | -2.25373 | -1.71659 | 3.878469 |
| 14 | 6  | -1.19747 | -3.1221  | 2.078376 |  | 14 | 6  | -1.41176 | -3.29509 | 2.731255 |
| 15 | 6  | -0.11102 | -3.15483 | 1.235785 |  | 15 | 6  | -0.25287 | -3.39193 | 1.992927 |
| 16 | 1  | -1.96614 | -3.86341 | 2.249968 |  | 16 | 1  | -2.17149 | -4.03804 | 2.934301 |
| 17 | 8  | 1.642817 | 1.347511 | -2.32702 |  | 17 | 8  | -1.81909 | -2.75066 | -0.79947 |
| 18 | 1  | 2.19544  | 0.869993 | -2.96324 |  | 18 | 1  | -2.45697 | -3.46921 | -0.92909 |
| 19 | 1  | 1.645446 | 2.287701 | -2.59604 |  | 19 | 1  | -1.44206 | -2.90067 | 0.091832 |
| 20 | 8  | -1.27567 | -0.88726 | -1.01975 |  | 20 | 8  | -0.41487 | -1.40061 | -5.01396 |
| 21 | 1  | -1.99922 | -0.98979 | -1.67559 |  | 21 | 1  | -0.96979 | -1.04299 | -5.7352  |
| 22 | 1  | -1.25241 | -1.7095  | -0.5002  |  | 22 | 1  | 0.291461 | -1.91028 | -5.43831 |
| 23 | 8  | -3.31886 | -1.16752 | -2.91413 |  | 23 | 8  | 0.548409 | 0.630579 | -0.87181 |
| 24 | 1  | -3.25858 | -1.71917 | -3.70949 |  | 24 | 1  | 0.884485 | 1.538307 | -0.92751 |
| 25 | 1  | -4.26492 | -1.03251 | -2.74927 |  | 25 | 1  | 0.900397 | 0.281851 | -0.02925 |
| 26 | 8  | -0.36446 | 2.897668 | -0.49756 |  | 26 | 8  | -3.01992 | 0.506296 | -3.94291 |
| 27 | 1  | 0.039632 | 3.53226  | -1.12248 |  | 27 | 1  | -2.95808 | 0.414235 | -4.91458 |
| 28 | 1  | -1.00193 | 3.393772 | 0.036783 |  | 28 | 1  | -3.79421 | 1.062291 | -3.76956 |
| 29 | 8  | 1.179237 | 4.165283 | -2.55131 |  | 29 | 19 | -1.11559 | -0.7526  | -2.47542 |
| 30 | 1  | 0.7476   | 4.54096  | -3.33693 |  | 30 | 8  | -2.36845 | -0.0946  | -6.69045 |
| 31 | 1  | 1.887965 | 4.78766  | -2.31641 |  | 31 | 1  | -2.98131 | -0.63611 | -7.2155  |
| 32 | 11 | 0.255473 | 0.700846 | -0.622   |  | 32 | 1  | -2.08141 | 0.62432  | -7.27804 |
|    |    |          |          |          |  |    |    |          |          |          |

**Na5\_h**

**K5\_h**

| Center Number | Atomic Number | Coordinates (Angstroms) |          |          | Center Number | Atomic Number | Coordinates (Angstroms) |          |          |
|---------------|---------------|-------------------------|----------|----------|---------------|---------------|-------------------------|----------|----------|
|               |               | X                       | Y        | Z        |               |               | X                       | Y        | Z        |
| 1             | 1             | -1.43587                | -0.76425 | 2.894723 | 1             | 1             | 2.47148                 | -2.25671 | 0.374775 |
| 2             | 6             | -0.75746                | -1.43691 | 2.37657  | 2             | 6             | 1.895052                | -1.63346 | 1.053982 |
| 3             | 6             | 1.018883                | -3.24737 | 1.060661 | 3             | 6             | 0.426306                | -0.00587 | 2.884697 |
| 4             | 6             | 0.582886                | -1.06714 | 2.152494 | 4             | 6             | 0.628851                | -2.05515 | 1.506925 |
| 5             | 6             | -1.19288                | -2.68806 | 1.942424 | 5             | 6             | 2.408353                | -0.42179 | 1.510934 |
| 6             | 6             | -0.31136                | -3.58351 | 1.288306 | 6             | 6             | 1.679006                | 0.386152 | 2.415114 |
| 7             | 6             | 1.452038                | -1.99088 | 1.504316 | 7             | 6             | -0.08221                | -1.23006 | 2.428623 |
| 8             | 1             | 1.697003                | -3.94271 | 0.573278 | 8             | 1             | -0.12014                | 0.605414 | 3.598507 |
| 9             | 1             | -2.21339                | -3.00277 | 2.146879 | 9             | 1             | 3.395498                | -0.10016 | 1.189654 |
| 10            | 1             | -0.67607                | -4.55863 | 0.978031 | 10            | 1             | 2.114104                | 1.316288 | 2.77042  |
| 11            | 1             | 1.057514                | 0.959711 | 3.043784 | 11            | 1             | 0.05881                 | -4.07363 | 0.65725  |
| 12            | 7             | 2.700036                | -1.40255 | 1.442534 | 12            | 7             | -1.26401                | -1.8781  | 2.727097 |
| 13            | 1             | 3.53111                 | -1.83211 | 1.061048 | 13            | 1             | -1.96236                | -1.55438 | 3.381178 |
| 14            | 6             | 2.654234                | -0.15724 | 2.032214 | 14            | 6             | -1.31897                | -3.07406 | 2.039023 |
| 15            | 6             | 1.372805                | 0.095903 | 2.471078 | 15            | 6             | -0.18621                | -3.2181  | 1.272726 |
| 16            | 1             | 3.551328                | 0.440909 | 2.121469 | 16            | 1             | -2.16175                | -3.74008 | 2.165994 |
| 17            | 8             | -1.81438                | -0.90339 | -0.75814 | 17            | 19            | 0.16713                 | 0.814116 | -0.60709 |
| 18            | 1             | -2.52098                | -1.29868 | -1.29409 | 18            | 8             | 1.81996                 | 1.783317 | -2.52258 |
| 19            | 1             | -1.66563                | -1.51213 | -0.0031  | 19            | 1             | 2.47333                 | 1.41266  | -3.13447 |



|               |               |                         |          |          |  |               |               |                         |          |          |
|---------------|---------------|-------------------------|----------|----------|--|---------------|---------------|-------------------------|----------|----------|
| 20            | 8             | 0.699483                | 0.09521  | -1.52739 |  | 20            | 1             | 1.776653                | 2.741706 | -2.71112 |
| 21            | 1             | 1.1463                  | -0.13637 | -2.35439 |  | 21            | 8             | -1.53055                | -1.17337 | -1.0442  |
| 22            | 1             | -0.14325                | -0.40642 | -1.50163 |  | 22            | 1             | -2.25489                | -1.38096 | -1.67157 |
| 23            | 8             | -1.45118                | 1.655005 | 0.360048 |  | 23            | 1             | -1.43347                | -1.95556 | -0.47287 |
| 24            | 1             | -1.8666                 | 0.857464 | -0.03083 |  | 24            | 8             | -3.59816                | -1.75061 | -2.87511 |
| 25            | 1             | -2.15593                | 2.302212 | 0.509044 |  | 25            | 1             | -3.50539                | -2.28438 | -3.67933 |
| 26            | 11            | 0.813822                | 1.618378 | 0.147725 |  | 26            | 1             | -4.5504                 | -1.62893 | -2.73875 |
| 27            | 8             | 2.041552                | 3.504826 | 0.174747 |  | 27            | 8             | -0.44741                | 3.456091 | -0.63035 |
| 28            | 1             | 2.168957                | 4.143859 | 0.891769 |  | 28            | 1             | 0.046666                | 4.013017 | -1.26449 |
| 29            | 1             | 2.449249                | 3.914209 | -0.6239  |  | 29            | 1             | -1.07023                | 4.044474 | -0.17812 |
| 30            | 8             | 3.150421                | 4.568669 | -2.13043 |  | 30            | 8             | 1.275037                | 4.61323  | -2.63835 |
| 31            | 1             | 4.1029                  | 4.660043 | -2.29059 |  | 31            | 1             | 0.882836                | 4.991661 | -3.44298 |
| 32            | 1             | 2.719752                | 5.254843 | -2.66429 |  | 32            | 1             | 1.968316                | 5.236452 | -2.36364 |
|               |               |                         |          |          |  |               |               |                         |          |          |
| <b>Na5_i</b>  |               |                         |          |          |  | <b>K5_i</b>   |               |                         |          |          |
| Center Number | Atomic Number | Coordinates (Angstroms) |          |          |  | Center Number | Atomic Number | Coordinates (Angstroms) |          |          |
|               |               | X                       | Y        | Z        |  |               |               | X                       | Y        | Z        |
| 1             | 1             | 2.165004                | -2.25523 | 0.68783  |  | 1             | 1             | -1.7665                 | -1.02586 | 2.763122 |
| 2             | 6             | 1.599674                | -1.66393 | 1.404079 |  | 2             | 6             | -0.92333                | -1.54303 | 2.312418 |
| 3             | 6             | 0.176955                | -0.11779 | 3.339662 |  | 3             | 6             | 1.293549                | -2.94709 | 1.18185  |
| 4             | 6             | 0.439983                | -2.18836 | 2.006392 |  | 4             | 6             | 0.309779                | -0.8848  | 2.14021  |
| 5             | 6             | 2.032573                | -0.39066 | 1.7697   |  | 5             | 6             | -1.03611                | -2.87712 | 1.923229 |
| 6             | 6             | 1.325423                | 0.375214 | 2.727466 |  | 6             | 6             | 0.0638                  | -3.57136 | 1.361819 |
| 7             | 6             | -0.24819                | -1.40147 | 2.974805 |  | 7             | 6             | 1.403088                | -1.60871 | 1.581684 |
| 8             | 1             | -0.35326                | 0.464968 | 4.088209 |  | 8             | 1             | 2.140265                | -3.4869  | 0.766315 |
| 9             | 1             | 2.95056                 | 0.007621 | 1.34459  |  | 9             | 1             | -1.96727                | -3.41092 | 2.09869  |
| 10            | 1             | 1.699683                | 1.356141 | 3.006923 |  | 10            | 1             | -0.04928                | -4.61653 | 1.087619 |
| 11            | 1             | 0.018949                | -4.30792 | 1.325355 |  | 11            | 1             | 0.257353                | 1.226731 | 2.954434 |
| 12            | 7             | -1.31497                | -2.15383 | 3.428264 |  | 12            | 7             | 2.487959                | -0.75489 | 1.557701 |
| 13            | 1             | -1.97029                | -1.87009 | 4.143072 |  | 13            | 1             | 3.421898                | -1.00475 | 1.264541 |
| 14            | 6             | -1.31689                | -3.37919 | 2.798008 |  | 14            | 6             | 2.12699                 | 0.464898 | 2.09672  |
| 15            | 6             | -0.26739                | -3.44075 | 1.906922 |  | 15            | 6             | 0.798503                | 0.433607 | 2.453807 |
| 16            | 1             | -2.0567                 | -4.12613 | 3.053297 |  | 16            | 1             | 2.861676                | 1.250715 | 2.212939 |
| 17            | 8             | -2.06636                | -2.38758 | -0.52991 |  | 17            | 19            | 0.029588                | 1.810012 | -0.50694 |
| 18            | 1             | -2.78774                | -3.00439 | -0.72773 |  | 18            | 8             | -2.00701                | -1.66746 | -0.95034 |
| 19            | 1             | -1.63567                | -2.73078 | 0.282379 |  | 19            | 1             | -2.5747                 | -2.31999 | -1.39147 |
| 20            | 8             | 0.486438                | -0.27094 | -3.2098  |  | 20            | 1             | -1.71383                | -2.08146 | -0.11021 |
| 21            | 1             | 0.899881                | 0.28436  | -2.51836 |  | 21            | 8             | 0.232719                | -0.34771 | -2.07244 |
| 22            | 1             | 1.201471                | -0.67867 | -3.72154 |  | 22            | 1             | 0.731895                | -0.75023 | -2.79792 |
| 23            | 8             | 0.175446                | 0.836741 | -0.70299 |  | 23            | 1             | -0.49571                | -0.96703 | -1.85441 |
| 24            | 1             | 0.025833                | 1.803272 | -0.5854  |  | 24            | 8             | -2.52943                | 1.047834 | -0.33343 |
| 25            | 1             | 0.667241                | 0.542543 | 0.088465 |  | 25            | 1             | -2.60734                | 0.098034 | -0.5625  |
| 26            | 11            | -1.31933                | -0.62915 | -1.71442 |  | 26            | 1             | -3.43034                | 1.380152 | -0.20725 |
| 27            | 8             | -2.27521                | 0.282079 | -3.5456  |  | 27            | 8             | 0.939318                | 4.314935 | -0.69386 |
| 28            | 1             | -1.49805                | 0.421647 | -4.11427 |  | 28            | 1             | 0.945415                | 5.046073 | -0.05795 |
| 29            | 1             | -3.05153                | 0.591564 | -4.03553 |  | 29            | 1             | 1.270932                | 4.698964 | -1.53706 |

|               |               |                         |          |          |  |               |               |                         |          |          |
|---------------|---------------|-------------------------|----------|----------|--|---------------|---------------|-------------------------|----------|----------|
| 30            | 8             | -0.24418                | 3.576905 | -0.489   |  | 30            | 8             | 1.843187                | 5.284053 | -3.15061 |
| 31            | 1             | 0.379765                | 4.255456 | -0.79065 |  | 31            | 1             | 2.765635                | 5.501442 | -3.35759 |
| 32            | 1             | -0.91094                | 4.038295 | 0.042996 |  | 32            | 1             | 1.299361                | 5.821791 | -3.74745 |
|               |               |                         |          |          |  |               |               |                         |          |          |
| <b>Na5_j</b>  |               |                         |          |          |  | <b>K5_j</b>   |               |                         |          |          |
| Center Number | Atomic Number | Coordinates (Angstroms) |          |          |  | Center Number | Atomic Number | Coordinates (Angstroms) |          |          |
|               |               | X                       | Y        | Z        |  |               |               | X                       | Y        | Z        |
| 1             | 1             | 2.298415                | -2.13352 | 0.908249 |  | 1             | 1             | -1.572                  | 0.687218 | 2.912316 |
| 2             | 6             | 1.645319                | -1.53026 | 1.534293 |  | 2             | 6             | -1.17722                | -0.26081 | 2.554301 |
| 3             | 6             | -0.01025                | 0.055135 | 3.239237 |  | 3             | 6             | -0.15596                | -2.78275 | 1.686919 |
| 4             | 6             | 0.466141                | -2.07935 | 2.074831 |  | 4             | 6             | 0.19652                 | -0.4001  | 2.264514 |
| 5             | 6             | 1.982364                | -0.21338 | 1.846495 |  | 5             | 6             | -2.01356                | -1.36126 | 2.405412 |
| 6             | 6             | 1.159919                | 0.571614 | 2.690973 |  | 6             | 6             | -1.50828                | -2.61032 | 1.974857 |
| 7             | 6             | -0.33987                | -1.27065 | 2.928313 |  | 7             | 6             | 0.683081                | -1.67008 | 1.836517 |
| 8             | 1             | -0.63011                | 0.654208 | 3.90111  |  | 8             | 1             | 0.233137                | -3.74937 | 1.377208 |
| 9             | 1             | 2.912517                | 0.206728 | 1.471888 |  | 9             | 1             | -3.07045                | -1.26959 | 2.639039 |
| 10            | 1             | 1.460855                | 1.58692  | 2.934133 |  | 10            | 1             | -2.18301                | -3.45818 | 1.892469 |
| 11            | 1             | 0.205214                | -4.25291 | 1.496805 |  | 11            | 1             | 1.341965                | 1.518383 | 2.639819 |
| 12            | 7             | -1.40378                | -2.04856 | 3.34026  |  | 12            | 7             | 2.044349                | -1.53867 | 1.635337 |
| 13            | 1             | -2.129                  | -1.75791 | 3.980816 |  | 13            | 1             | 2.673745                | -2.28804 | 1.384504 |
| 14            | 6             | -1.2906                 | -3.31047 | 2.795472 |  | 14            | 6             | 2.431289                | -0.24692 | 1.933265 |
| 15            | 6             | -0.1662                 | -3.37149 | 2.003569 |  | 15            | 6             | 1.331031                | 0.486904 | 2.311646 |
| 16            | 1             | -2.01544                | -4.07715 | 3.033976 |  | 16            | 1             | 3.47172                 | 0.041961 | 1.869817 |
| 17            | 8             | -1.85141                | -2.70505 | -0.75269 |  | 17            | 19            | -0.0256                 | 0.97632  | -0.71743 |
| 18            | 1             | -2.44022                | -3.44664 | -1.01423 |  | 18            | 8             | 1.548389                | 2.327986 | -2.45932 |
| 19            | 1             | -1.4961                 | -2.93614 | 0.126991 |  | 19            | 1             | 2.263302                | 2.116661 | -3.07812 |
| 20            | 8             | 0.365637                | -0.24229 | -3.42344 |  | 20            | 1             | 1.358152                | 3.280561 | -2.57265 |
| 21            | 1             | 0.887637                | 0.246013 | -2.75985 |  | 21            | 8             | -1.22111                | -1.30609 | -1.30064 |
| 22            | 1             | 0.988788                | -0.57083 | -4.08975 |  | 22            | 1             | -1.68191                | -1.70824 | -2.06759 |
| 23            | 8             | 0.176099                | 0.576566 | -0.75038 |  | 23            | 1             | -1.36985                | -1.90702 | -0.55063 |
| 24            | 1             | -0.089                  | 1.482904 | -0.52556 |  | 24            | 8             | -2.53885                | -2.41911 | -3.52575 |
| 25            | 1             | 0.697503                | 0.265955 | 0.020454 |  | 25            | 1             | -2.18973                | -3.11689 | -4.10152 |
| 26            | 11            | -1.30019                | -0.87601 | -1.8737  |  | 26            | 1             | -3.49388                | -2.38469 | -3.69039 |
| 27            | 8             | -2.36411                | 0.588972 | -3.24494 |  | 27            | 8             | -1.02915                | 3.48783  | -0.57334 |
| 28            | 1             | -1.69655                | 0.791819 | -3.92228 |  | 28            | 1             | -0.60713                | 4.166625 | -1.13678 |
| 29            | 1             | -3.20416                | 0.963641 | -3.55005 |  | 29            | 1             | -1.77129                | 3.924225 | -0.1288  |
| 30            | 8             | -3.51988                | -4.78927 | -1.57591 |  | 30            | 8             | 0.56699                 | 5.041686 | -2.40449 |
| 31            | 1             | -4.47309                | -4.87772 | -1.42093 |  | 31            | 1             | 0.148576                | 5.408945 | -3.2011  |
| 32            | 1             | -3.23979                | -5.60403 | -2.02121 |  | 32            | 1             | 1.137965                | 5.747099 | -2.05671 |
|               |               |                         |          |          |  |               |               |                         |          |          |
| <b>Na5_k</b>  |               |                         |          |          |  | <b>K5_k</b>   |               |                         |          |          |
| Center Number | Atomic Number | Coordinates (Angstroms) |          |          |  | Center Number | Atomic Number | Coordinates (Angstroms) |          |          |
|               |               | X                       | Y        | Z        |  |               |               | X                       | Y        | Z        |
| 1             | 1             | -1.06623                | -0.85388 | 2.540863 |  | 1             | 1             | 1.82455                 | -2.88152 | 0.431186 |
| 2             | 6             | -0.36484                | -1.52726 | 2.054267 |  | 2             | 6             | 1.514857                | -2.14108 | 1.164658 |
| 3             | 6             | 1.476613                | -3.33508 | 0.828726 |  | 3             | 6             | 0.765161                | -0.21447 | 3.136827 |

|    |    |          |          |          |  |    |    |          |          |          |
|----|----|----------|----------|----------|--|----|----|----------|----------|----------|
| 4  | 6  | 0.896267 | -1.06334 | 1.626693 |  | 4  | 6  | 0.332863 | -2.32222 | 1.908608 |
| 5  | 6  | -0.69144 | -2.86548 | 1.85715  |  | 5  | 6  | 2.301563 | -1.01682 | 1.411494 |
| 6  | 6  | 0.22091  | -3.75982 | 1.248865 |  | 6  | 6  | 1.927519 | -0.06146 | 2.387691 |
| 7  | 6  | 1.800349 | -1.98646 | 1.026928 |  | 7  | 6  | -0.01523 | -1.35187 | 2.892424 |
| 8  | 1  | 2.179689 | -4.02732 | 0.373212 |  | 8  | 1  | 0.489655 | 0.510884 | 3.897737 |
| 9  | 1  | -1.65325 | -3.23948 | 2.197452 |  | 9  | 1  | 3.240961 | -0.89114 | 0.878539 |
| 10 | 1  | -0.06004 | -4.8013  | 1.121285 |  | 10 | 1  | 2.572728 | 0.793069 | 2.572288 |
| 11 | 1  | 1.202204 | 1.132897 | 2.103649 |  | 11 | 1  | -0.69286 | -4.2763  | 1.400365 |
| 12 | 7  | 2.952365 | -1.28648 | 0.717167 |  | 12 | 7  | -1.18059 | -1.78287 | 3.495863 |
| 13 | 1  | 3.790132 | -1.687   | 0.318979 |  | 13 | 1  | -1.65355 | -1.31566 | 4.256568 |
| 14 | 6  | 2.812369 | 0.029493 | 1.104518 |  | 14 | 6  | -1.56731 | -2.98632 | 2.945147 |
| 15 | 6  | 1.563966 | 0.214997 | 1.657009 |  | 15 | 6  | -0.67679 | -3.349   | 1.958798 |
| 16 | 1  | 3.627465 | 0.729075 | 0.977559 |  | 16 | 1  | -2.43896 | -3.50564 | 3.320616 |
| 17 | 8  | 1.475354 | 1.760443 | -2.433   |  | 17 | 8  | -2.63634 | -2.09364 | -0.34486 |
| 18 | 1  | 1.944676 | 1.415461 | -3.20701 |  | 18 | 1  | -3.51721 | -2.48558 | -0.24204 |
| 19 | 1  | 1.378717 | 2.724988 | -2.56531 |  | 19 | 1  | -2.11718 | -2.42441 | 0.41665  |
| 20 | 8  | -1.11579 | -0.9262  | -1.12216 |  | 20 | 8  | 0.695425 | -0.72319 | -3.48764 |
| 21 | 1  | -1.74572 | -1.18224 | -1.8311  |  | 21 | 1  | 1.176029 | -0.26528 | -2.77101 |
| 22 | 1  | -1.16997 | -1.61604 | -0.43858 |  | 22 | 1  | 1.339682 | -0.95478 | -4.17245 |
| 23 | 8  | -2.90273 | -1.60155 | -3.16232 |  | 23 | 8  | 0.713896 | 0.522115 | -0.99928 |
| 24 | 1  | -2.75798 | -2.31892 | -3.79882 |  | 24 | 1  | 0.925179 | 1.452938 | -0.82329 |
| 25 | 1  | -3.86384 | -1.48912 | -3.09661 |  | 25 | 1  | 1.085853 | 0.029059 | -0.23844 |
| 26 | 8  | -0.53277 | 2.897767 | -0.26768 |  | 26 | 8  | -3.48623 | 0.911357 | -3.65731 |
| 27 | 1  | -0.22767 | 3.637577 | -0.8302  |  | 27 | 1  | -3.34259 | 1.410026 | -4.4758  |
| 28 | 1  | -1.25741 | 3.23881  | 0.27748  |  | 28 | 1  | -4.4484  | 0.989061 | -3.46859 |
| 29 | 8  | 0.788536 | 4.532732 | -2.21353 |  | 29 | 19 | -1.67834 | -0.5005  | -2.29341 |
| 30 | 1  | 0.292184 | 4.993219 | -2.91094 |  | 30 | 8  | -6.2139  | 1.062039 | -3.05082 |
| 31 | 1  | 1.464837 | 5.162611 | -1.91201 |  | 31 | 1  | -6.63206 | 1.847019 | -2.66349 |
| 32 | 11 | 0.250787 | 0.800766 | -0.75708 |  | 32 | 1  | -6.90017 | 0.625414 | -3.57953 |
|    |    |          |          |          |  |    |    |          |          |          |

| Na5_I         |               |                         |          |          | K5_I          |               |                         |          |          |
|---------------|---------------|-------------------------|----------|----------|---------------|---------------|-------------------------|----------|----------|
| Center Number | Atomic Number | Coordinates (Angstroms) |          |          | Center Number | Atomic Number | Coordinates (Angstroms) |          |          |
|               |               | X                       | Y        | Z        |               |               | X                       | Y        | Z        |
| 1             | 1             | 2.069072                | 1.640719 | -0.34499 | 1             | 1             | 2.586591                | -1.95291 | 0.491193 |
| 2             | 6             | 1.311372                | 1.452397 | 0.411469 | 2             | 6             | 1.997704                | -1.34188 | 1.169915 |
| 3             | 6             | -0.67403                | 1.005916 | 2.416541 | 3             | 6             | 0.486697                | 0.267031 | 2.984333 |
| 4             | 6             | 1.474287                | 0.403464 | 1.339343 | 4             | 6             | 0.748491                | -1.7947  | 1.637517 |
| 5             | 6             | 0.17521                 | 2.25581  | 0.489897 | 5             | 6             | 2.476846                | -0.1115  | 1.61158  |
| 6             | 6             | -0.8097                 | 2.03215  | 1.482912 | 6             | 6             | 1.726925                | 0.686745 | 2.508348 |
| 7             | 6             | 0.473678                | 0.205242 | 2.337215 | 7             | 6             | 0.017301                | -0.97953 | 2.549004 |
| 8             | 1             | -1.42697                | 0.843874 | 3.183142 | 8             | 1             | -0.07807                | 0.872201 | 3.68857  |
| 9             | 1             | 0.04537                 | 3.076282 | -0.21048 | 9             | 1             | 3.456891                | 0.230643 | 1.288507 |
| 10            | 1             | -1.67814                | 2.683208 | 1.529718 | 10            | 1             | 2.139034                | 1.631001 | 2.854685 |
| 11            | 1             | 3.412609                | -0.72004 | 1.012455 | 11            | 1             | 0.267536                | -3.8727  | 0.875395 |
| 12            | 7             | 0.876243                | -0.86608 | 3.1092   | 12            | 7             | -1.13502                | -1.66696 | 2.878602 |
| 13            | 1             | 0.388474                | -1.22118 | 3.919702 | 13            | 1             | -1.84134                | -1.34965 | 3.527571 |

|    |    |          |          |          |  |    |    |          |          |          |
|----|----|----------|----------|----------|--|----|----|----------|----------|----------|
| 14 | 6  | 2.084925 | -1.3407  | 2.643349 |  | 14 | 6  | -1.1507  | -2.8806  | 2.225931 |
| 15 | 6  | 2.48334  | -0.60062 | 1.554049 |  | 15 | 6  | -0.02349 | -2.99652 | 1.441056 |
| 16 | 1  | 2.577405 | -2.16576 | 3.140045 |  | 16 | 1  | -1.95507 | -3.58393 | 2.396216 |
| 17 | 8  | -1.90752 | 0.982679 | -2.33634 |  | 17 | 19 | 0.552269 | 1.45002  | -0.59024 |
| 18 | 1  | -1.82073 | 1.944301 | -2.52892 |  | 18 | 8  | -1.70521 | -1.87796 | -1.07805 |
| 19 | 1  | -2.52389 | 0.630719 | -2.99555 |  | 19 | 1  | -2.34398 | -2.50455 | -1.45488 |
| 20 | 8  | 0.355765 | -2.00089 | -0.65565 |  | 20 | 1  | -1.34098 | -2.30449 | -0.27069 |
| 21 | 1  | 0.681785 | -2.51557 | -1.42848 |  | 21 | 8  | 0.479716 | -0.58444 | -2.34552 |
| 22 | 1  | 1.112482 | -1.91775 | -0.04627 |  | 22 | 1  | 0.876671 | -0.91566 | -3.16442 |
| 23 | 8  | 1.231514 | -3.48899 | -2.84279 |  | 23 | 1  | -0.25896 | -1.18796 | -2.12309 |
| 24 | 1  | 1.704973 | -3.1691  | -3.62641 |  | 24 | 8  | -2.06038 | 0.844848 | -0.37981 |
| 25 | 1  | 1.257324 | -4.45756 | -2.88659 |  | 25 | 1  | -2.19917 | -0.08889 | -0.64257 |
| 26 | 8  | -2.25239 | -1.87209 | 0.210553 |  | 26 | 1  | -2.93747 | 1.247777 | -0.30131 |
| 27 | 1  | -3.06683 | -2.34624 | 0.433055 |  | 27 | 8  | 1.578846 | 3.851814 | -1.15006 |
| 28 | 1  | -1.54345 | -2.5301  | 0.087226 |  | 28 | 1  | 2.328315 | 4.276827 | -0.67549 |
| 29 | 8  | -1.59231 | 3.720336 | -2.75234 |  | 29 | 1  | 1.33316  | 4.471693 | -1.85328 |
| 30 | 1  | -2.30882 | 4.355928 | -2.59619 |  | 30 | 8  | 3.72098  | 4.954047 | 0.27231  |
| 31 | 1  | -1.06494 | 4.08682  | -3.47979 |  | 31 | 1  | 4.625644 | 4.984871 | -0.07679 |
| 32 | 11 | -1.0461  | -0.10719 | -0.56909 |  | 32 | 1  | 3.635008 | 5.719713 | 0.861818 |

**k5\_m**

|  |  | Center<br>Number | Atomic<br>Number | Coordinates (Angstroms) |          |          |
|--|--|------------------|------------------|-------------------------|----------|----------|
|  |  |                  |                  | X                       | Y        | Z        |
|  |  | 1                | 1                | 1.994855                | -2.8777  | 0.580303 |
|  |  | 2                | 6                | 1.561507                | -2.12007 | 1.228528 |
|  |  | 3                | 6                | 0.474087                | -0.13397 | 2.969228 |
|  |  | 4                | 6                | 0.367842                | -2.37798 | 1.930151 |
|  |  | 5                | 6                | 2.194069                | -0.89334 | 1.402756 |
|  |  | 6                | 6                | 1.655083                | 0.09101  | 2.264363 |
|  |  | 7                | 6                | -0.15361                | -1.37318 | 2.79532  |
|  |  | 8                | 1                | 0.071819                | 0.617379 | 3.643763 |
|  |  | 9                | 1                | 3.128454                | -0.69173 | 0.886025 |
|  |  | 10               | 1                | 2.188255                | 1.028012 | 2.404026 |
|  |  | 11               | 1                | -0.39354                | -4.47861 | 1.556875 |
|  |  | 12               | 7                | -1.30024                | -1.88637 | 3.373173 |
|  |  | 13               | 1                | -1.87463                | -1.413   | 4.056091 |
|  |  | 14               | 6                | -1.51027                | -3.17005 | 2.918648 |
|  |  | 15               | 6                | -0.51981                | -3.50971 | 2.023105 |
|  |  | 16               | 1                | -2.3424                 | -3.75367 | 3.289252 |
|  |  | 17               | 8                | -2.19556                | -2.55071 | -0.58254 |
|  |  | 18               | 1                | -3.02946                | -3.04144 | -0.64301 |
|  |  | 19               | 1                | -1.79491                | -2.82287 | 0.268892 |
|  |  | 20               | 8                | 0.38171                 | -1.95529 | -4.04187 |
|  |  | 21               | 1                | 1.12269                 | -1.61354 | -4.56702 |
|  |  | 22               | 1                | 0.337795                | -2.90182 | -4.25122 |
|  |  | 23               | 8                | 0.162431                | 1.171624 | -0.65167 |

|  |  |  |  |  |  |    |    |          |          |          |
|--|--|--|--|--|--|----|----|----------|----------|----------|
|  |  |  |  |  |  | 24 | 1  | 0.299789 | 2.14004  | -0.72209 |
|  |  |  |  |  |  | 25 | 1  | 0.61029  | 0.89772  | 0.168175 |
|  |  |  |  |  |  | 26 | 8  | -3.01749 | 0.431122 | -3.76357 |
|  |  |  |  |  |  | 27 | 1  | -3.15228 | 0.222002 | -4.70147 |
|  |  |  |  |  |  | 28 | 1  | -3.66914 | 1.120776 | -3.56071 |
|  |  |  |  |  |  | 29 | 19 | -1.08757 | -0.63346 | -2.12673 |
|  |  |  |  |  |  | 30 | 8  | 0.546742 | 3.955381 | -0.92936 |
|  |  |  |  |  |  | 31 | 1  | 1.339905 | 4.369387 | -1.30341 |
|  |  |  |  |  |  | 32 | 1  | 0.079296 | 4.65472  | -0.44695 |
